# Supplementary material for: ArcticAI: A Deep Learning Platform for Rapid and Accurate Histological Assessment of Intraoperative Tumor Margins
Source: bioRxiv or medRxiv preprint supplement (doi:10.1101/2022.05.06.22274781), 2022-05-10
Supplement: Supplementary file [file media-6.pdf]

# Hand Drawn and Predicted Surgical Tumor Maps

|                                         |                                                         |                              |
|-----------------------------------------|---------------------------------------------------------|------------------------------|
| Tumor Type<br><i>Nodules BCC</i>        | Location (per path report)<br><i>Right Nasal Bridge</i> | Anatomic Area<br><i>FACE</i> |
| Initial size (cm)<br><i>0.9 x 0.7cm</i> | Final Defect (cm)<br><i>1.1 x 0.9cm</i>                 | Room #<br><i>303</i>         |

  

Su  
Su

AN-FIP  
4cm  
S.OF

R

Mohs Accession #: \_\_\_\_\_

Date: \_\_\_\_\_

R

So  
So

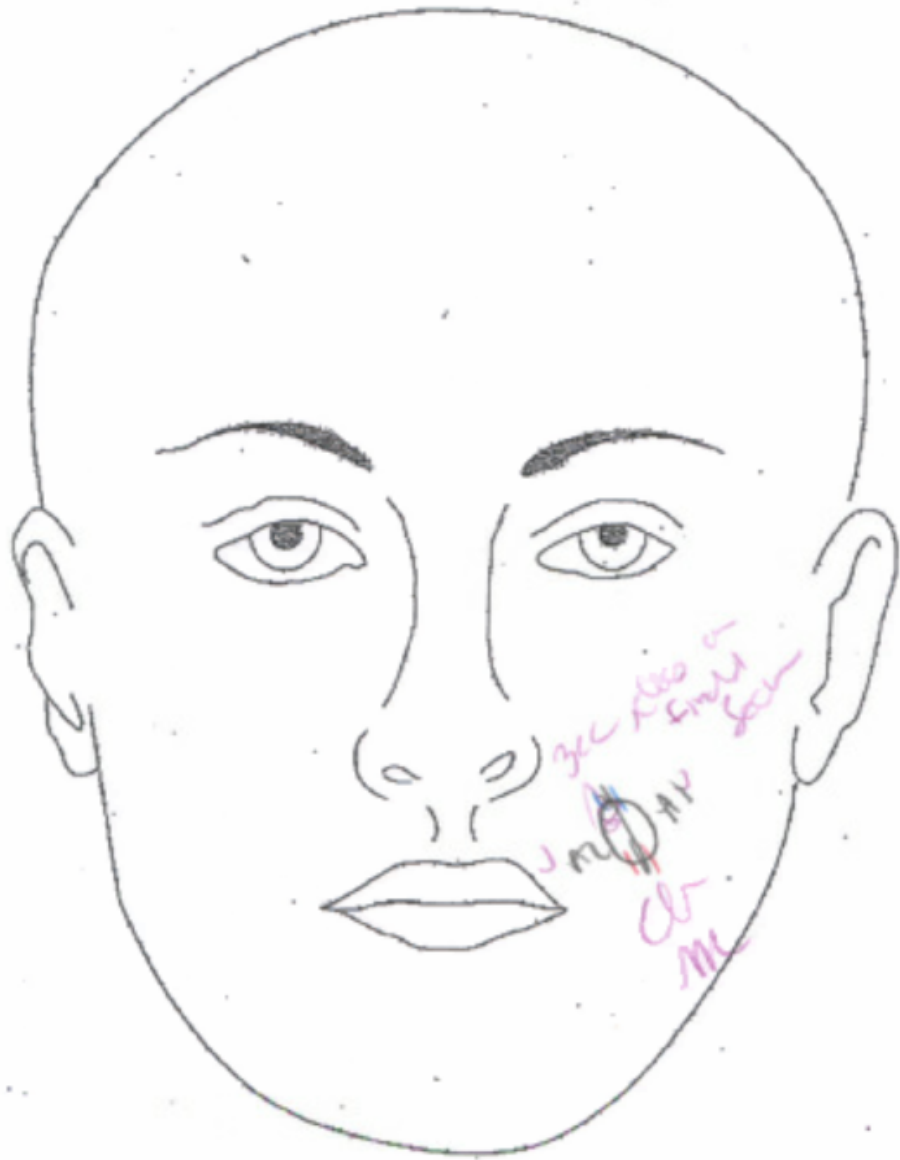

ILL  
4-11m  
S. VP

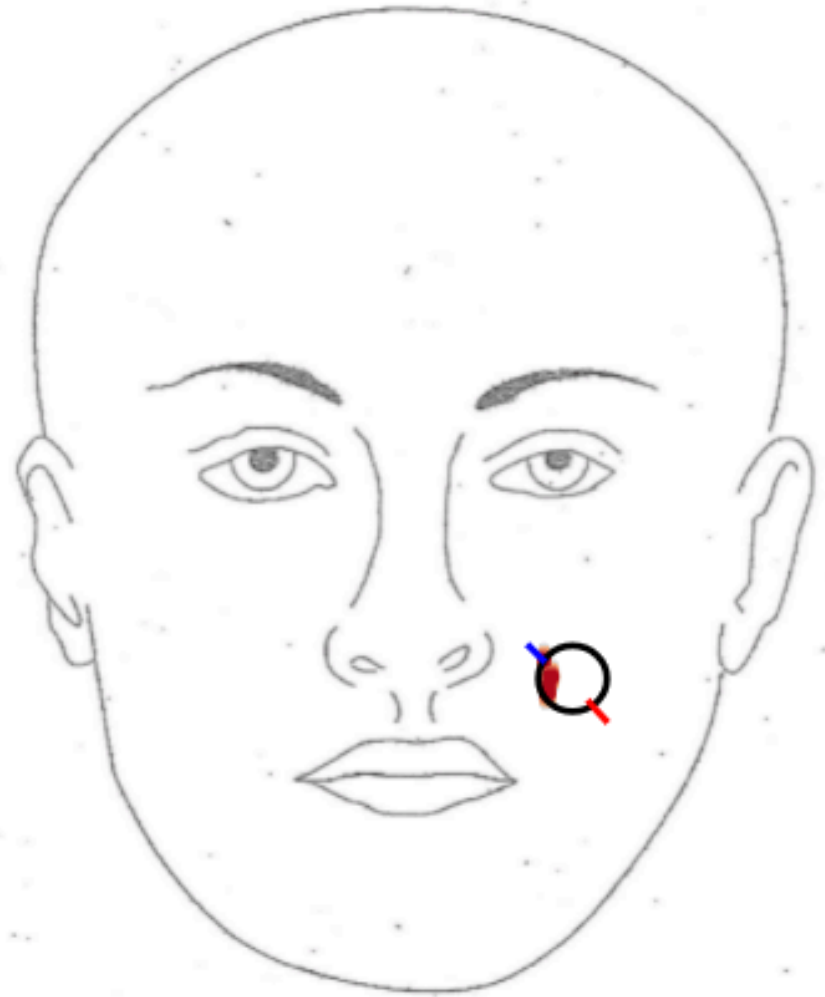

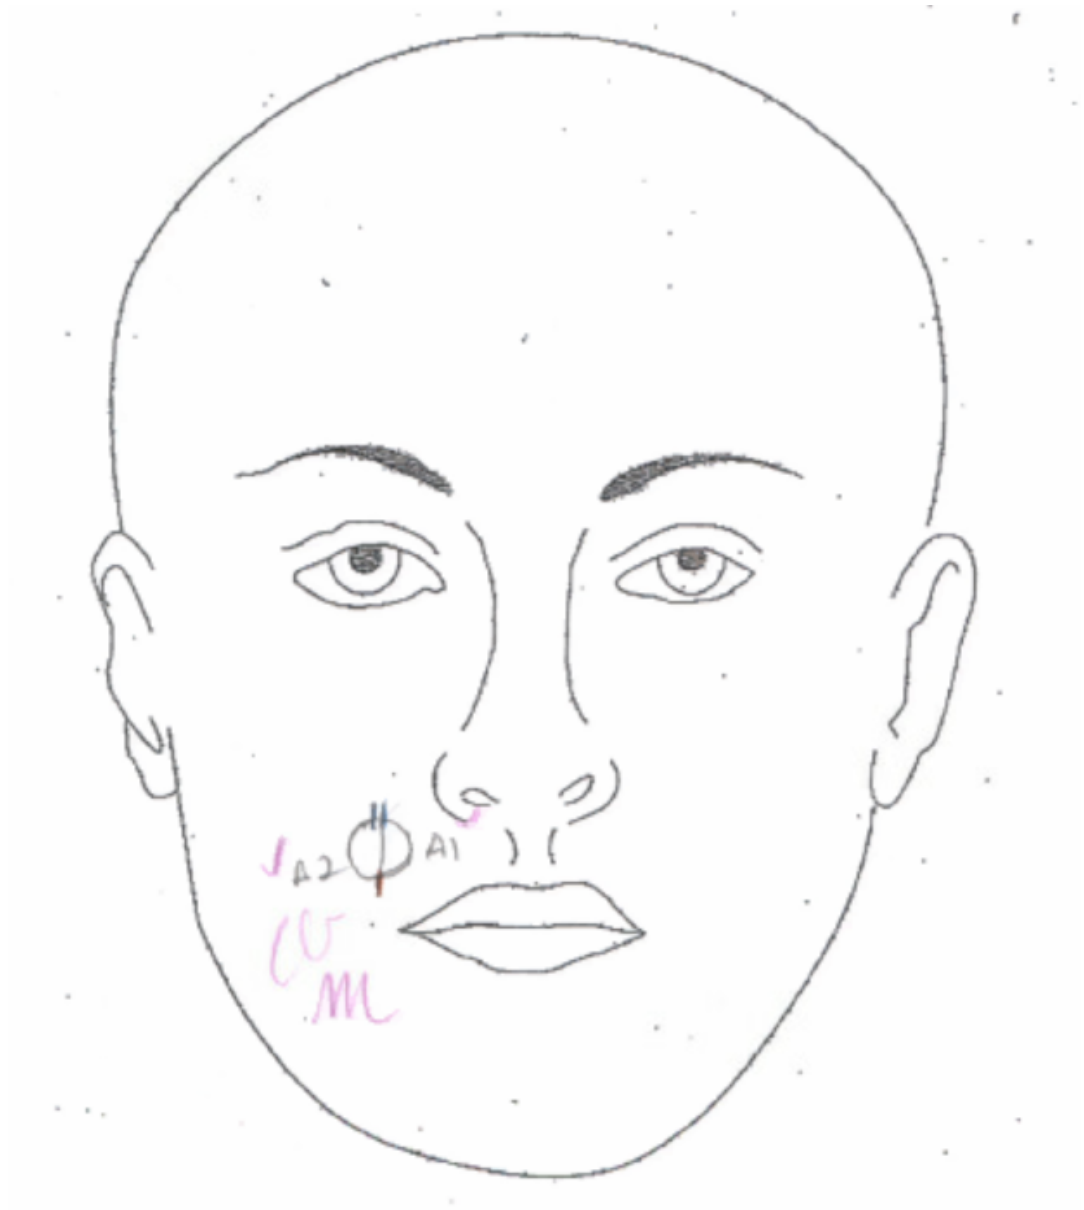

|                                   |                                   |               |
|-----------------------------------|-----------------------------------|---------------|
| Initial size (cm)<br>0.8 x 0.7 cm | Final Defect (cm)<br>2.7 x 1.1 cm | Room #<br>306 |
|-----------------------------------|-----------------------------------|---------------|

3cc  
to tissue

R

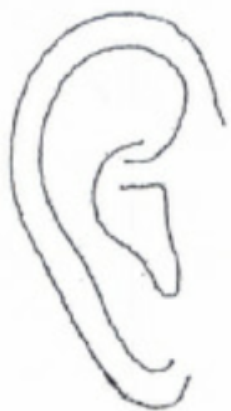

PF  
cm  
K

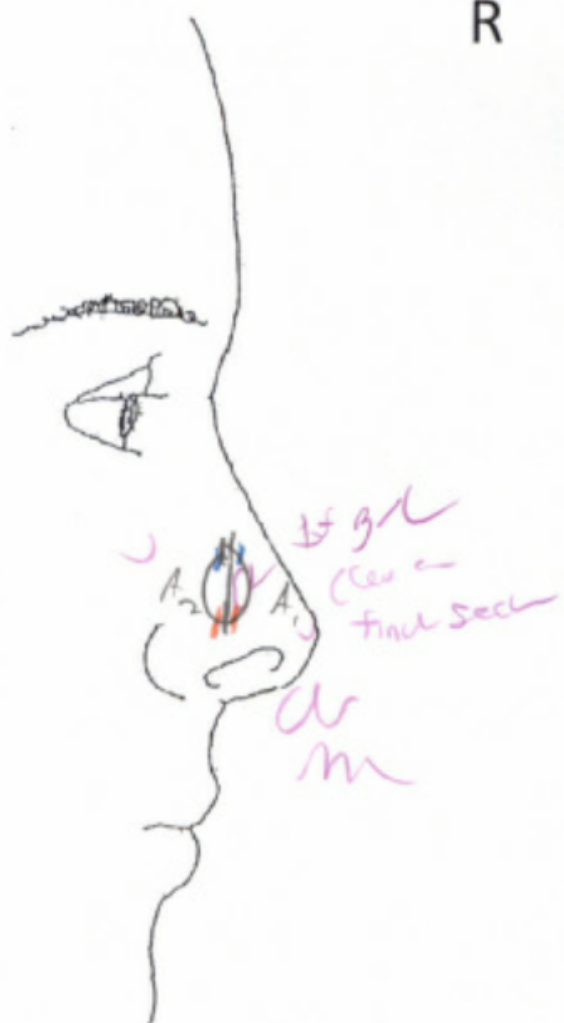

Mohs Accession #: \_\_\_\_\_

R

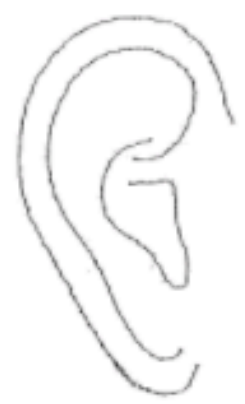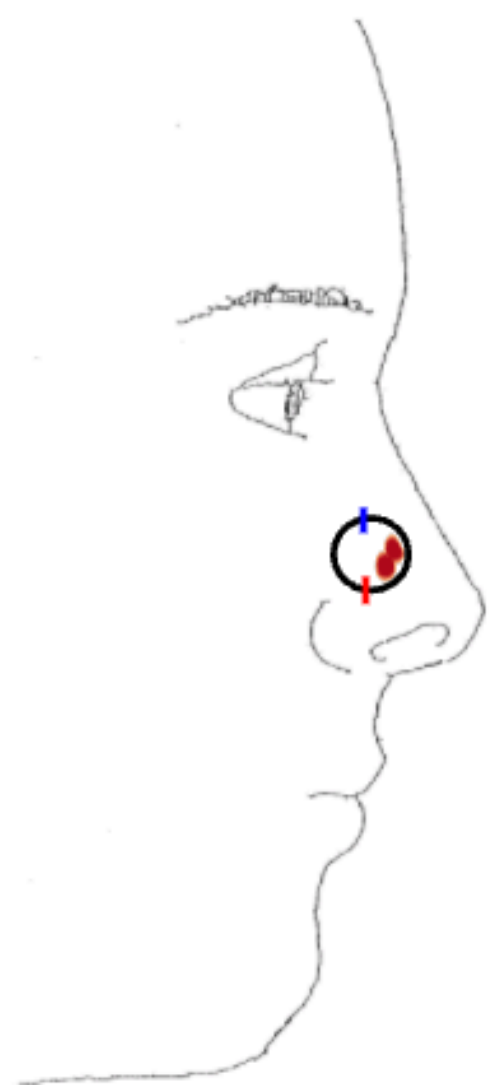

Mohs Accession #: \_\_\_\_\_

Date: \_\_\_\_\_

Same  
orionidrum

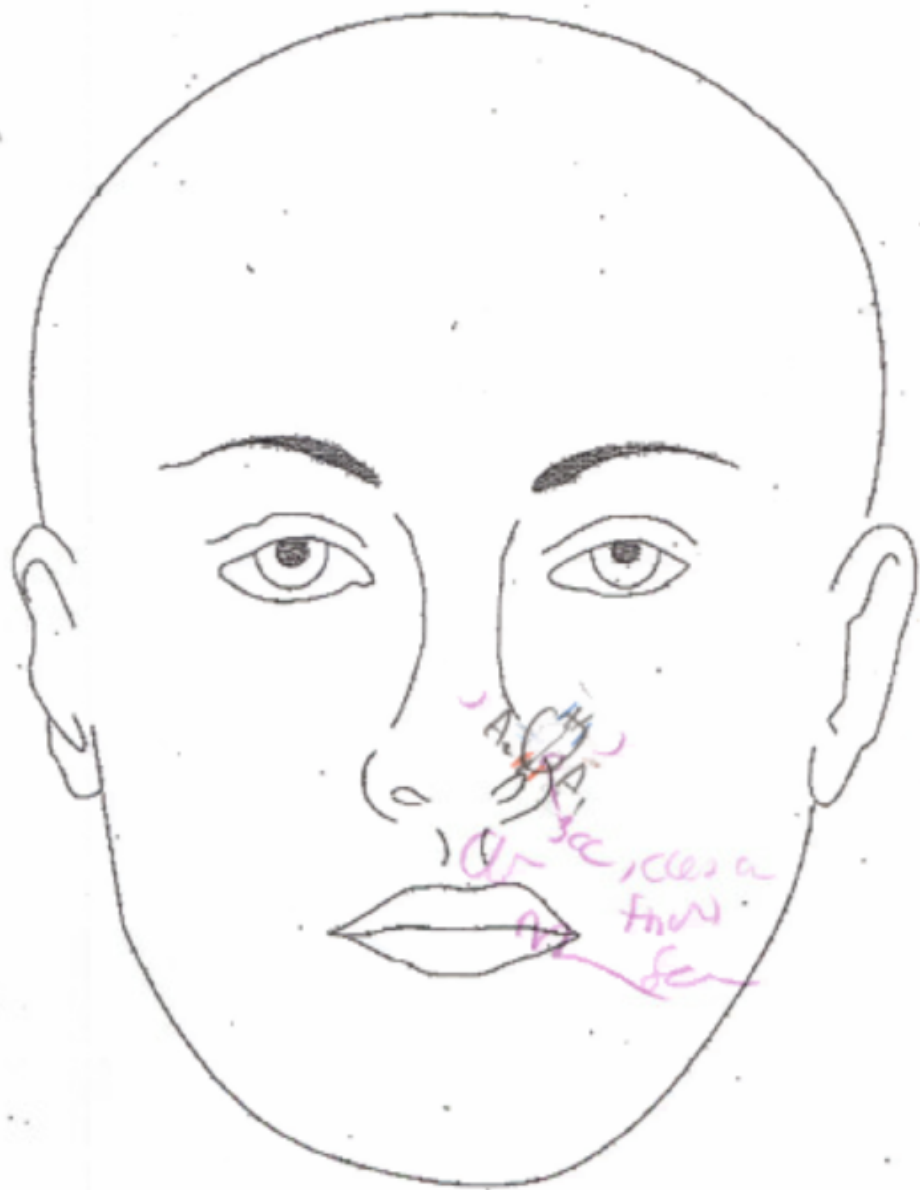

take  
tap/  
vrows  
nom  
siof

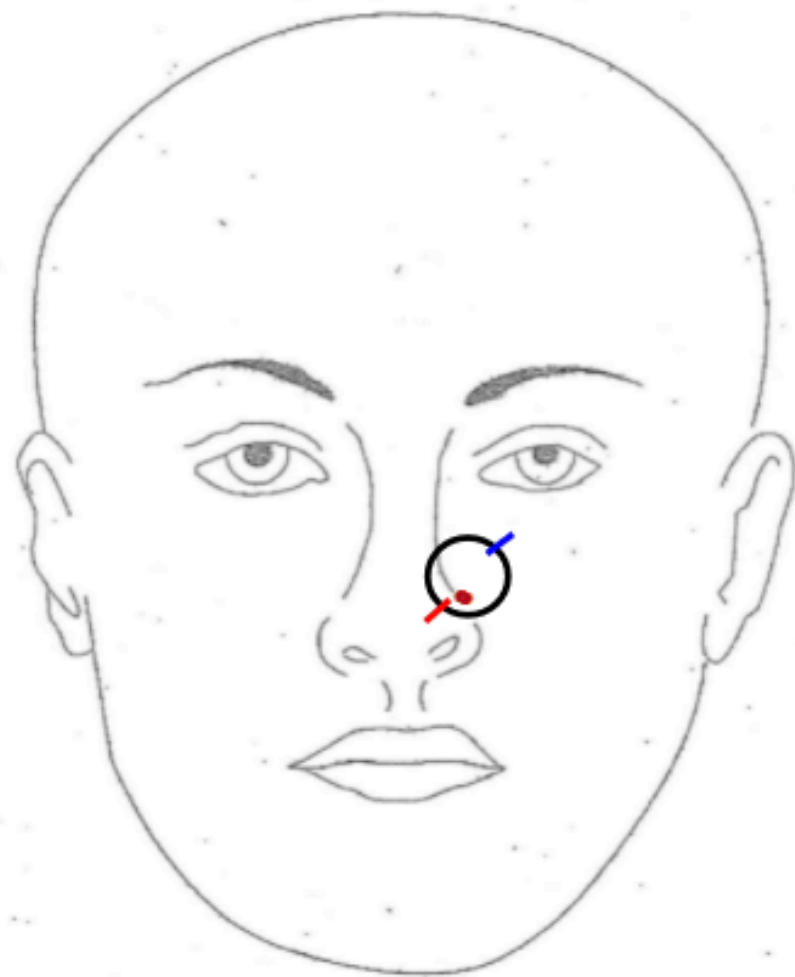

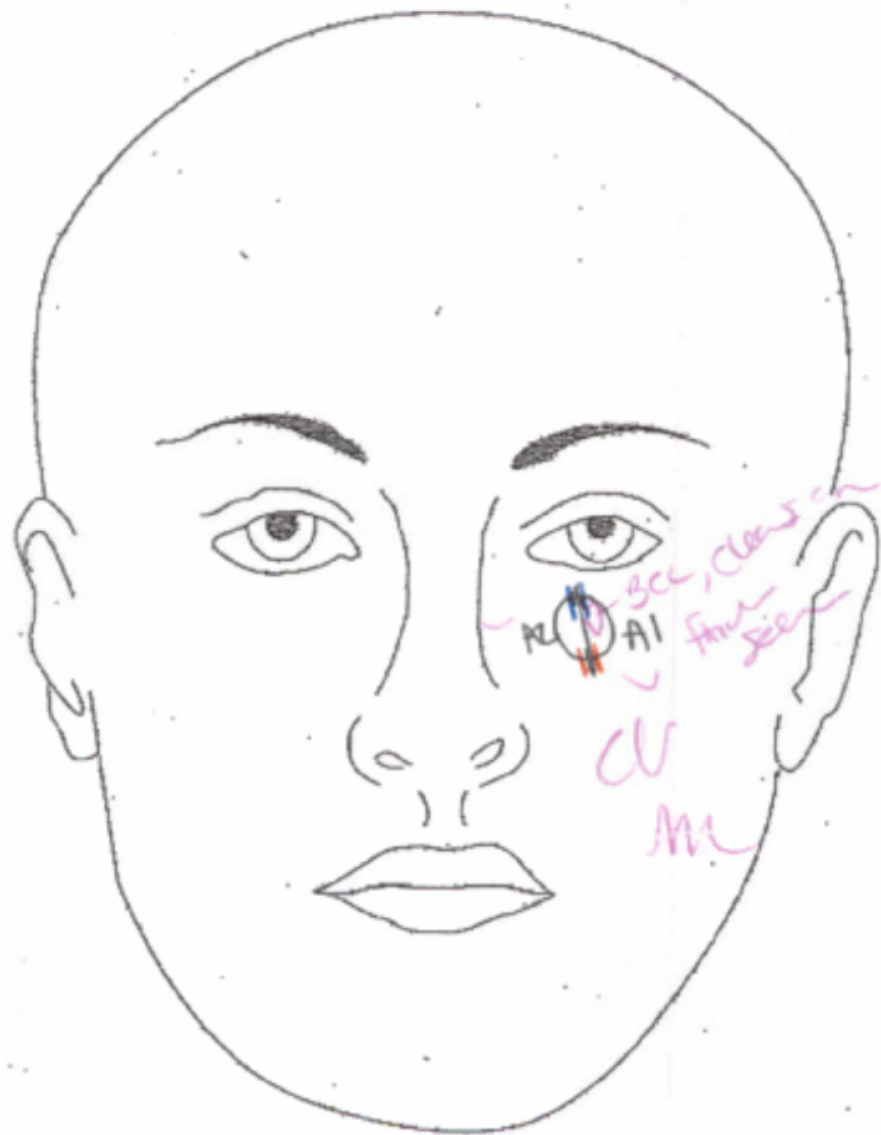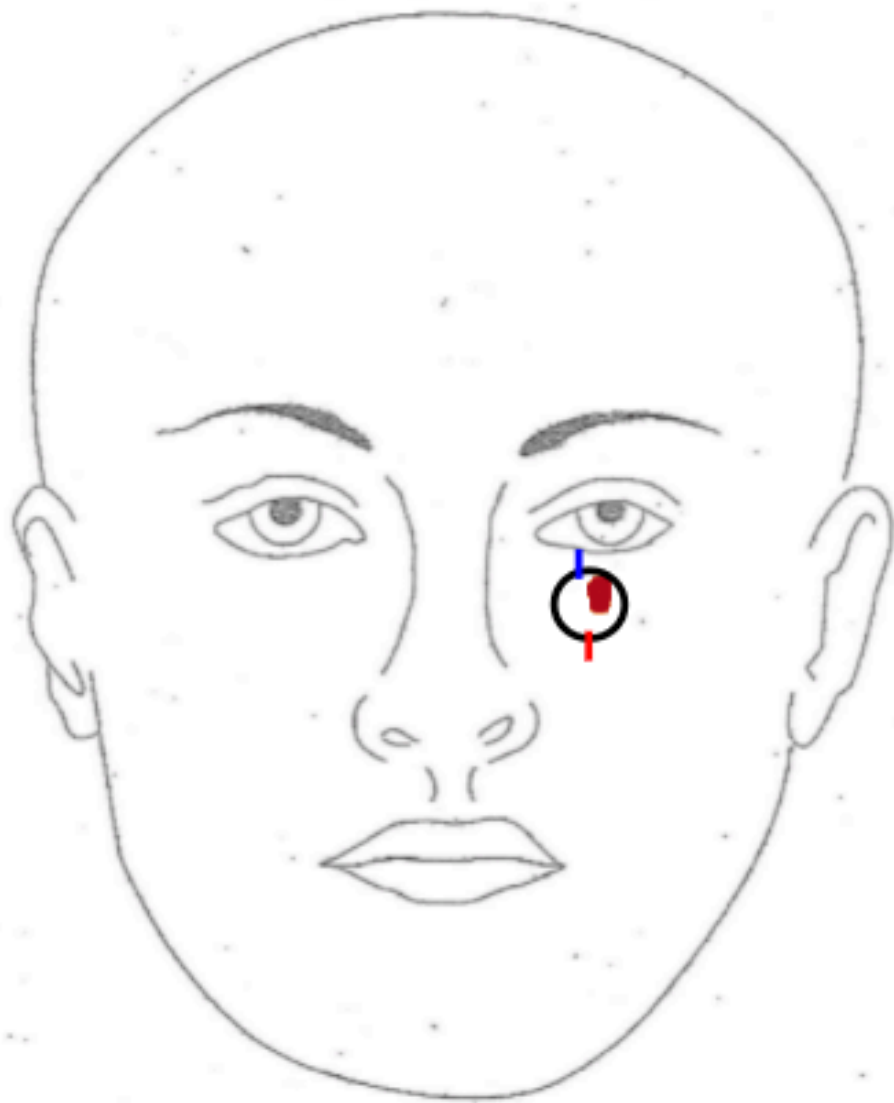

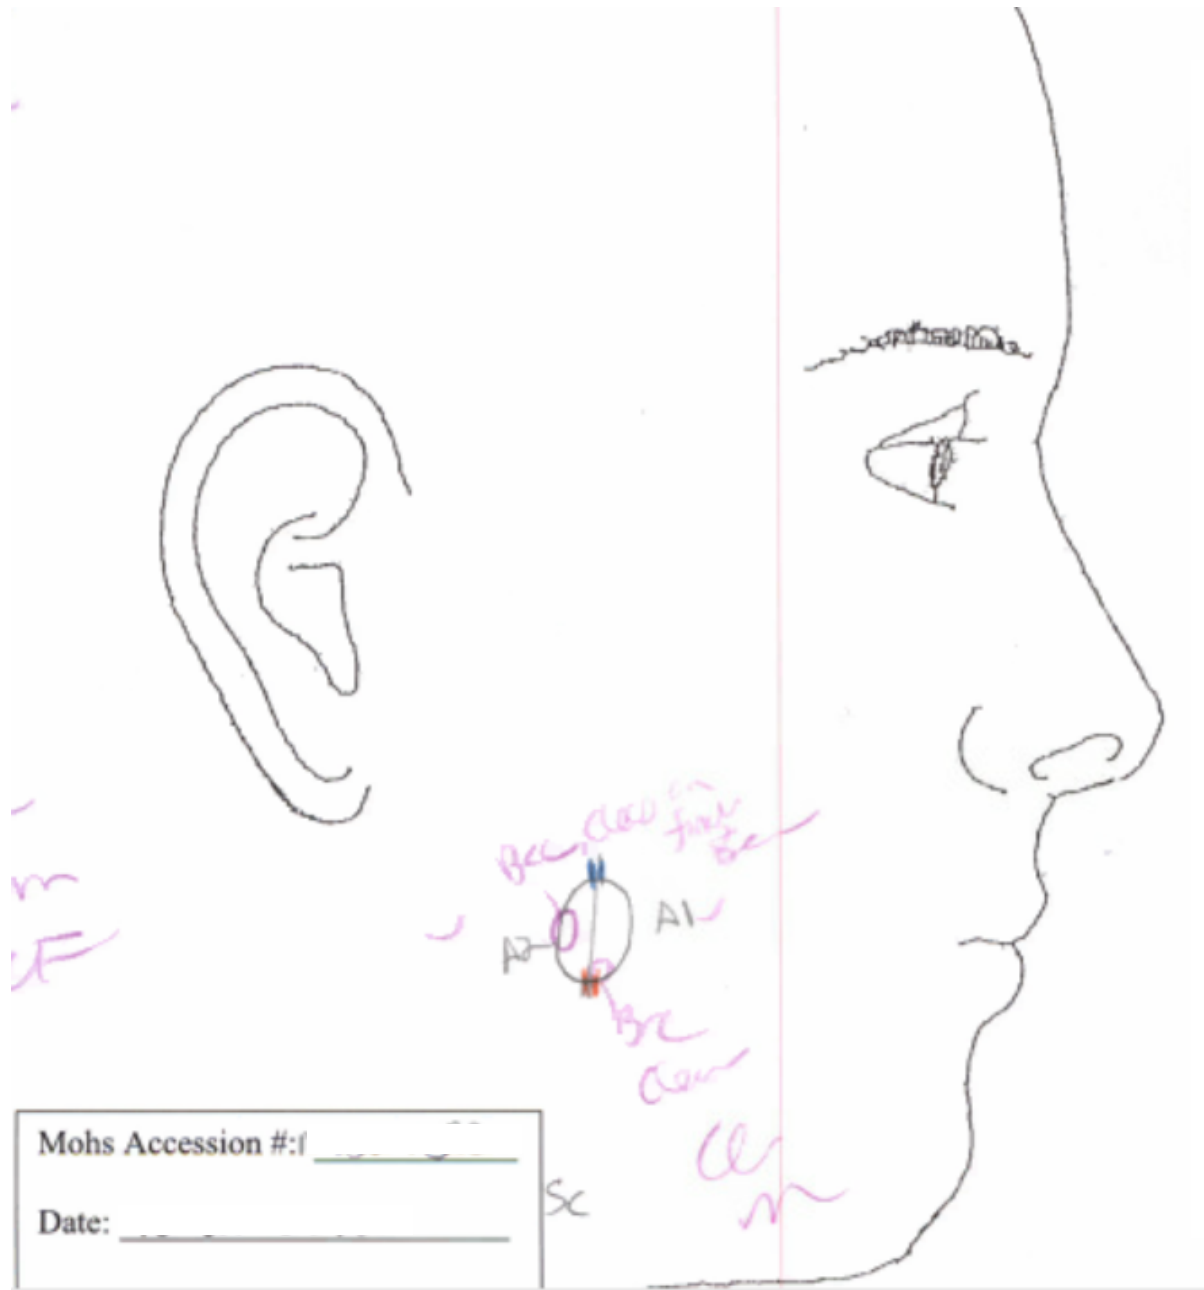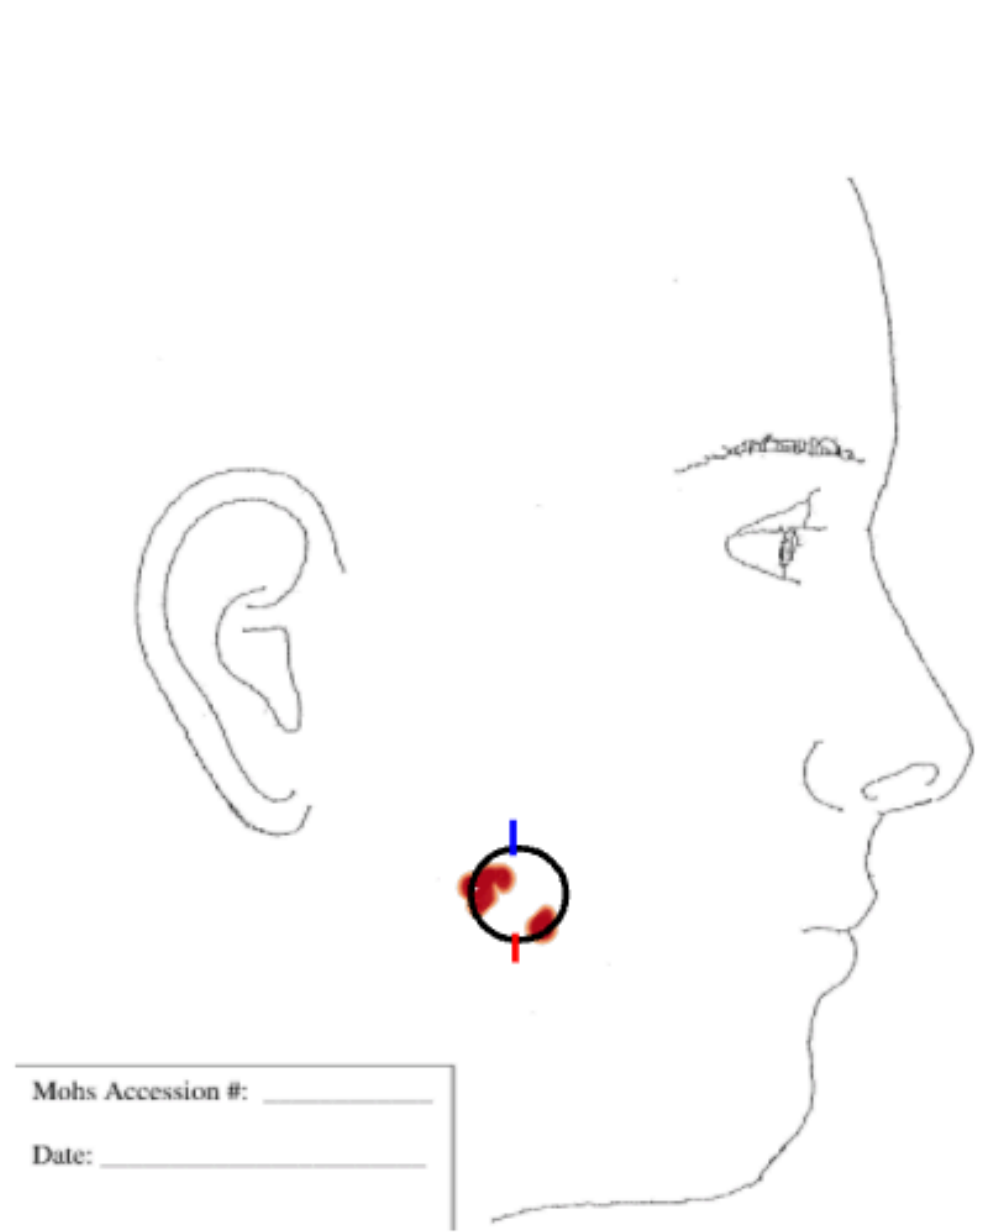

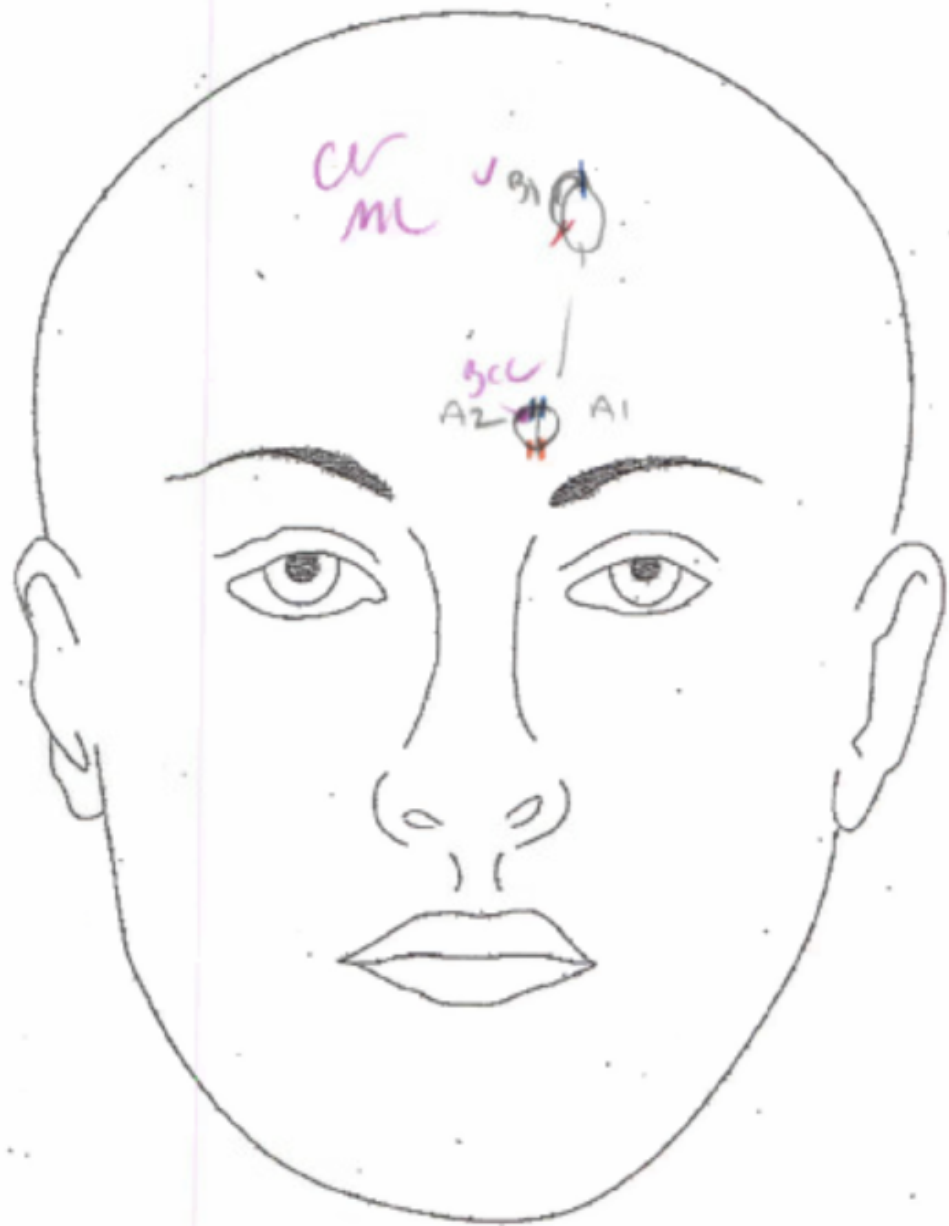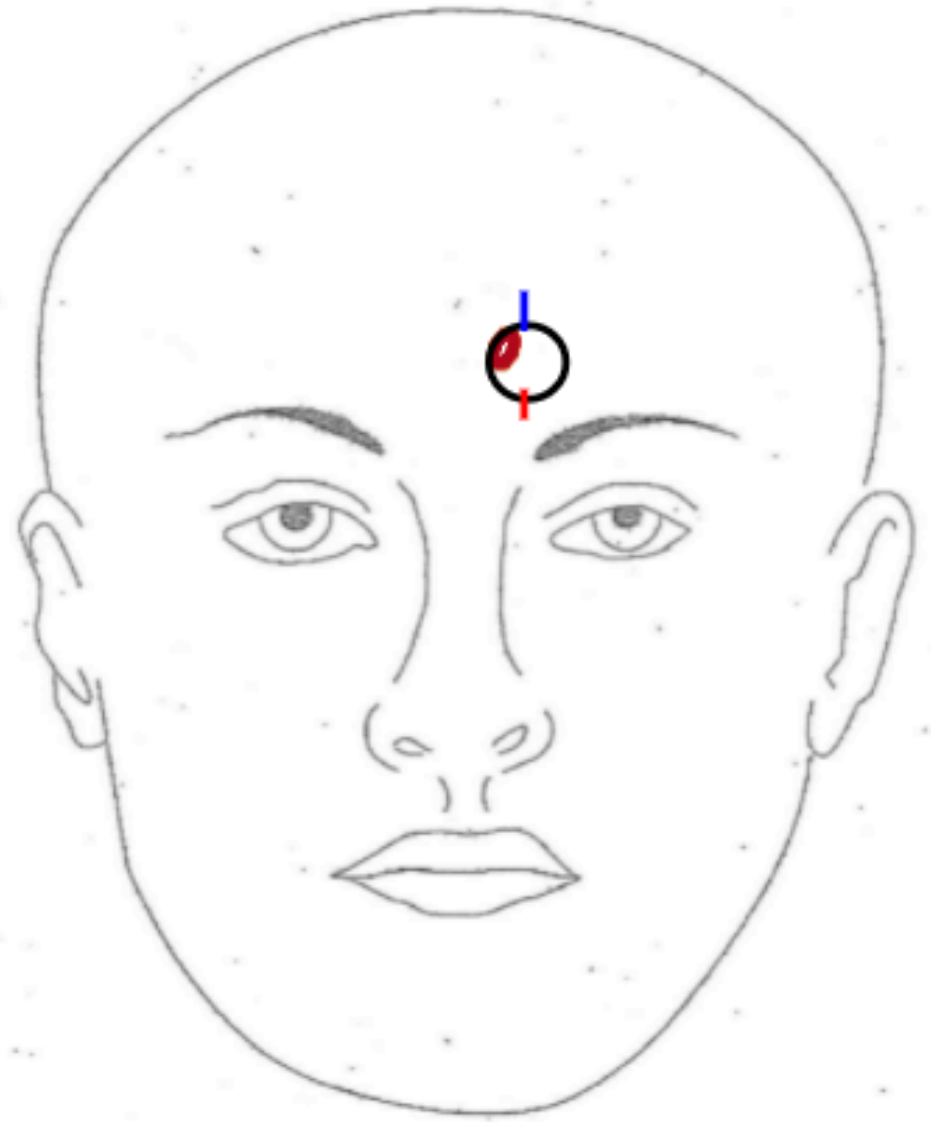



Initial size (cm)

1.0 x 1.3 cm

Final Defect (cm)

1.8 x 1.5 cm

Room #

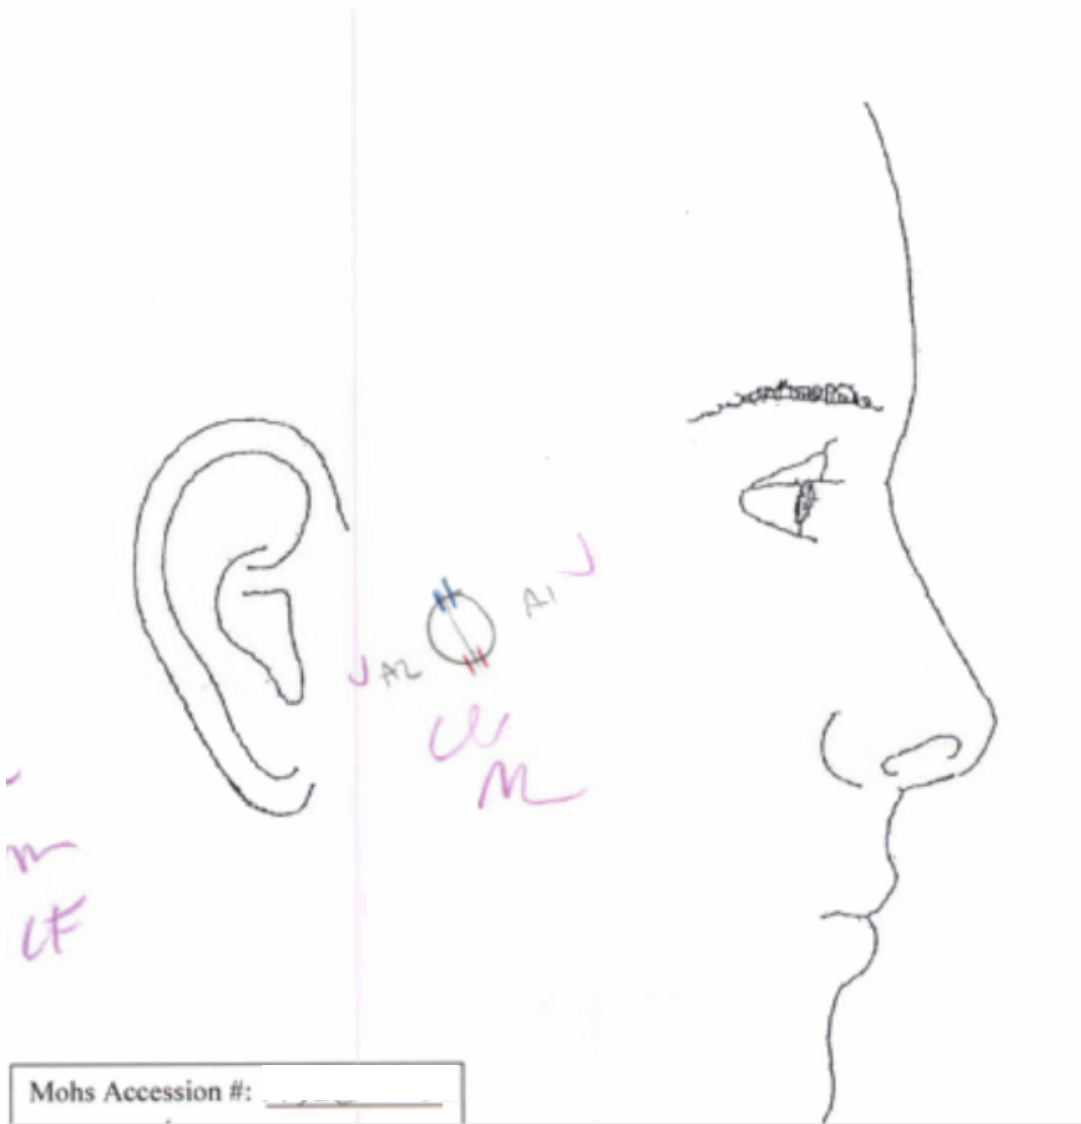

Mohs Accession #: \_\_\_\_\_

|                                |                                |               |
|--------------------------------|--------------------------------|---------------|
| Initial size (cm)<br>0.8 x 0.7 | Final Defect (cm)<br>2.0 x 1.6 | Room #<br>305 |
|--------------------------------|--------------------------------|---------------|

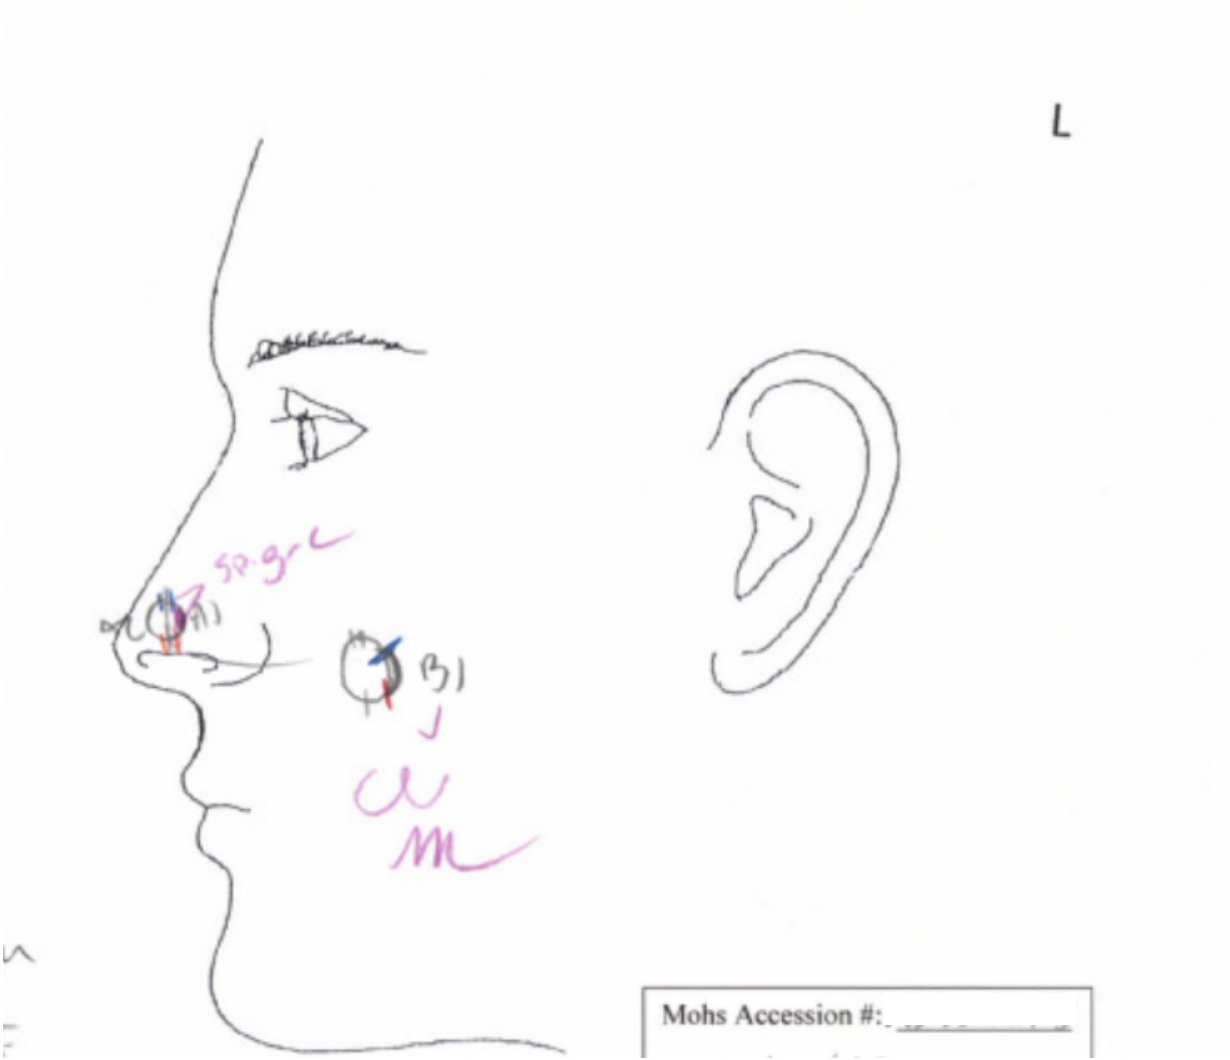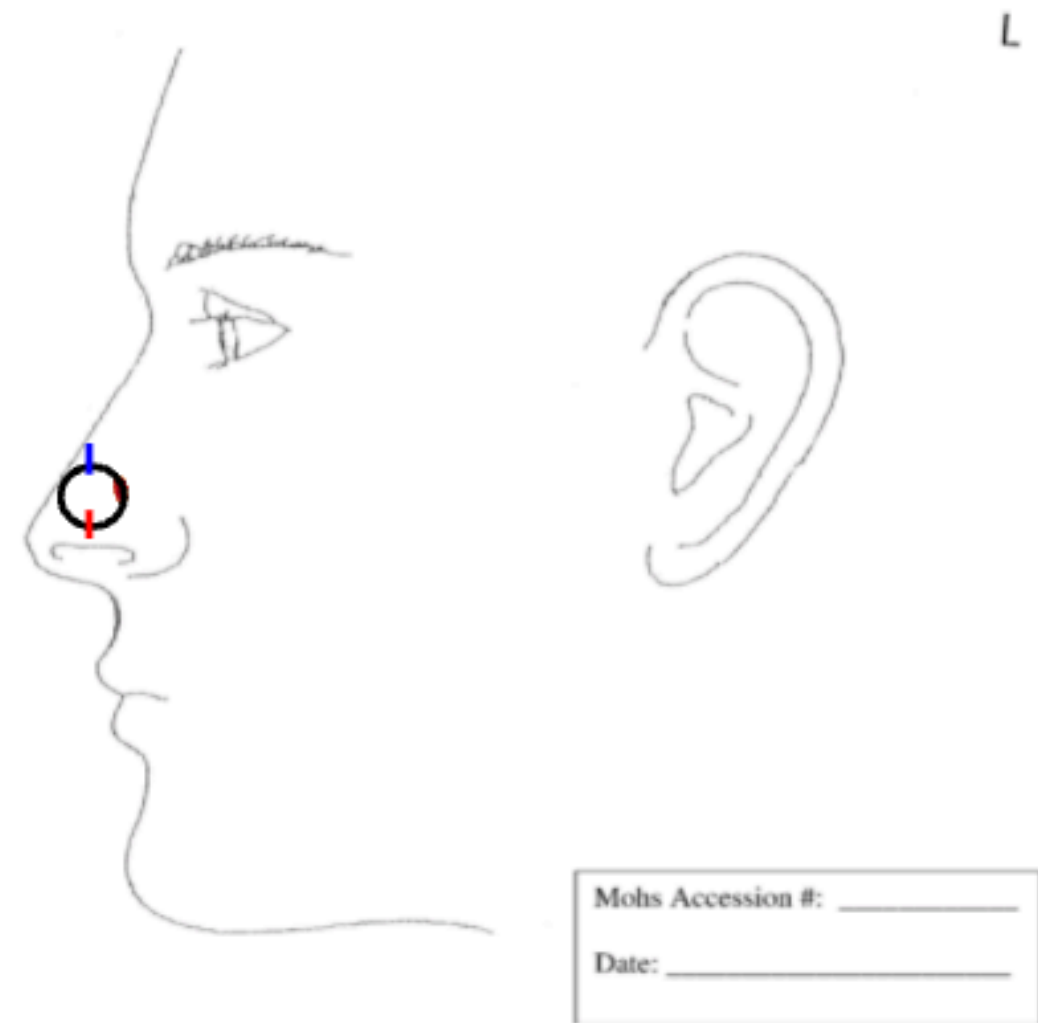

|                                   |                                       |               |
|-----------------------------------|---------------------------------------|---------------|
| Initial size (cm)<br>0.8 x 1.4 cm | Final Defect (cm)<br>2.6 x 1.7 cm (B) | Room #<br>303 |
|-----------------------------------|---------------------------------------|---------------|

cc Inf  
side

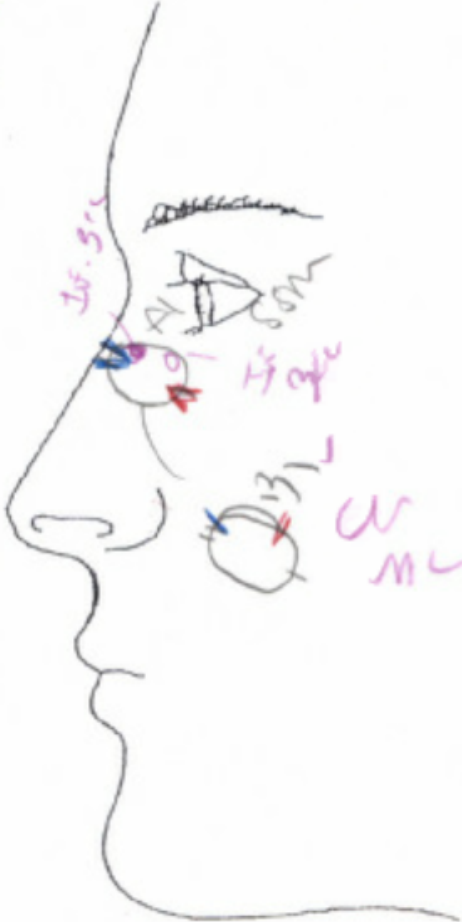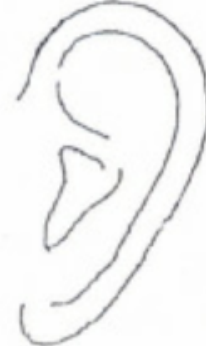

L

Mohs Accession #: \_\_\_\_\_  
Date: \_\_\_\_\_

A1

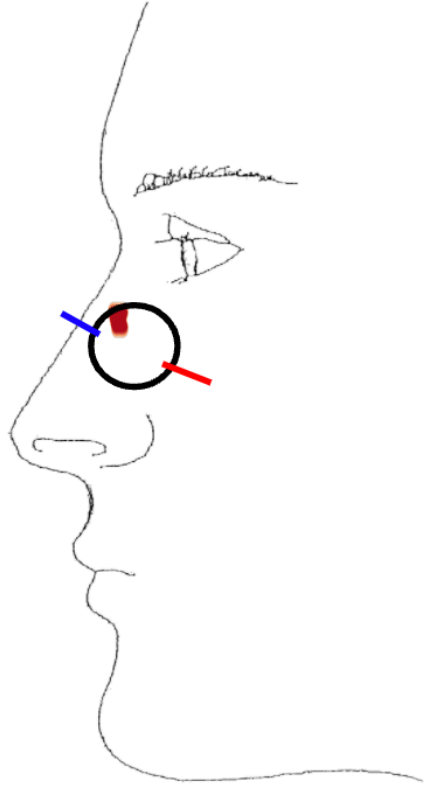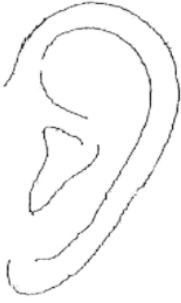

L

Mohs Accession #: \_\_\_\_\_  
Date: \_\_\_\_\_

| Initial size (cm) | Final Detect (cm) | 304 |
|-------------------|-------------------|-----|
| 2.8 x 0.5 cm      | 1.1 x 0.9 cm (A)  |     |
|                   | 1.2 x 1.0 cm (B)  |     |

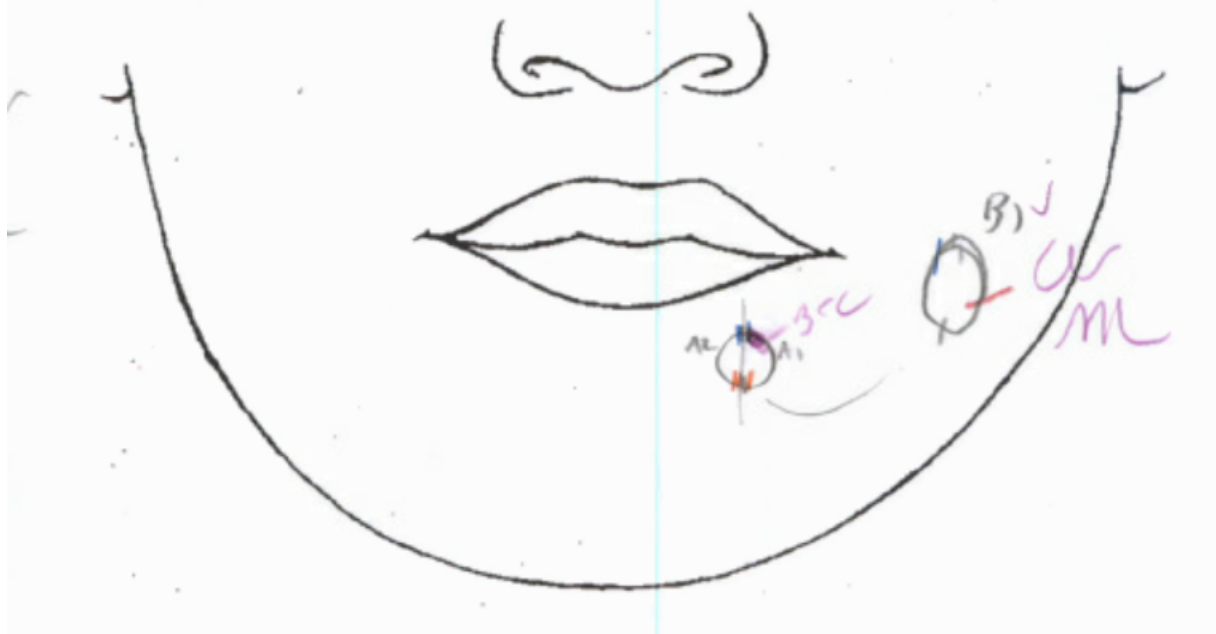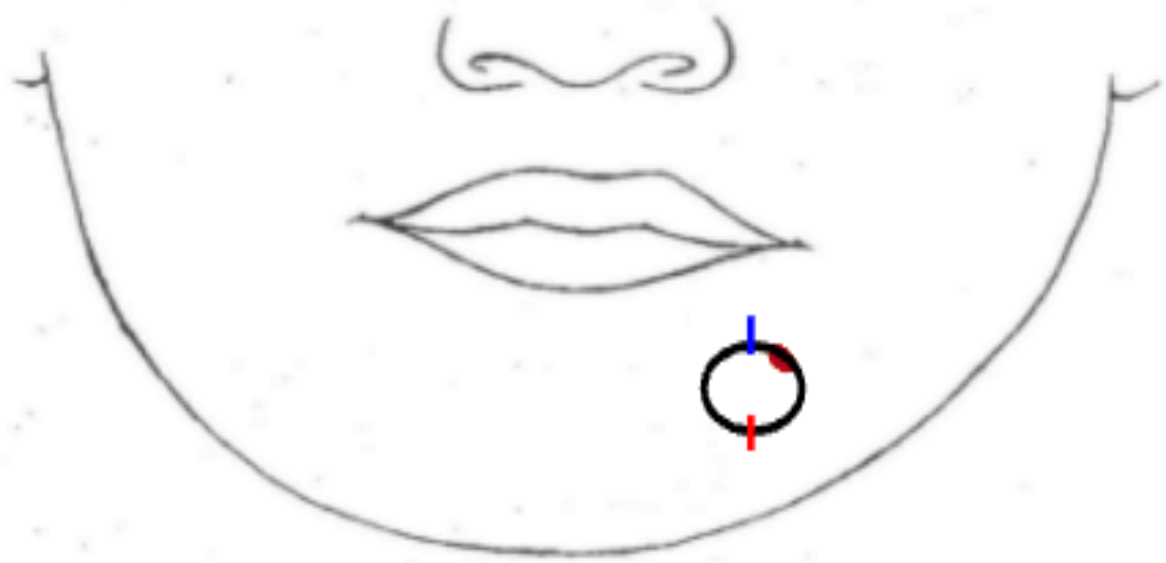

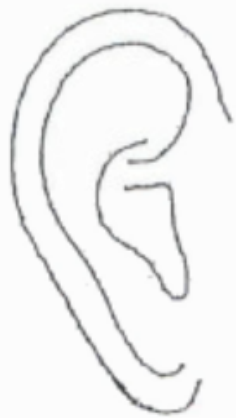

Mohs Accession # \_\_\_\_\_

Date: \_\_\_\_\_

AI

R

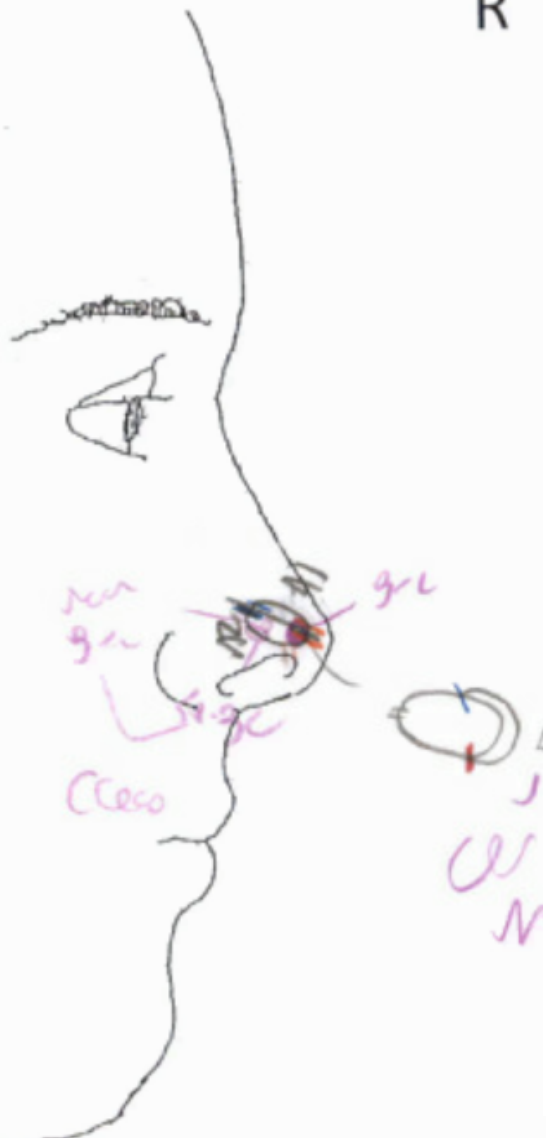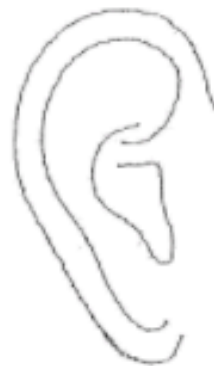

Mohs Accession #: \_\_\_\_\_

Date: \_\_\_\_\_

R

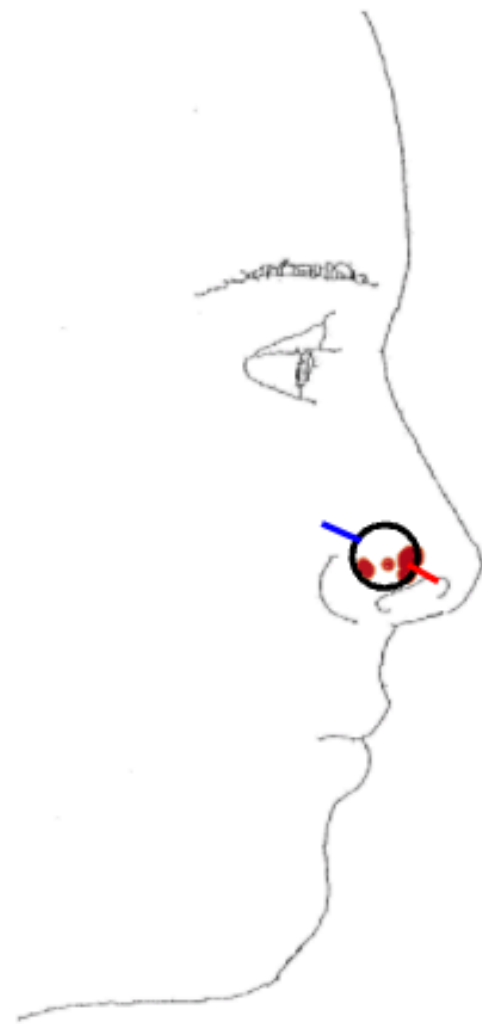

R

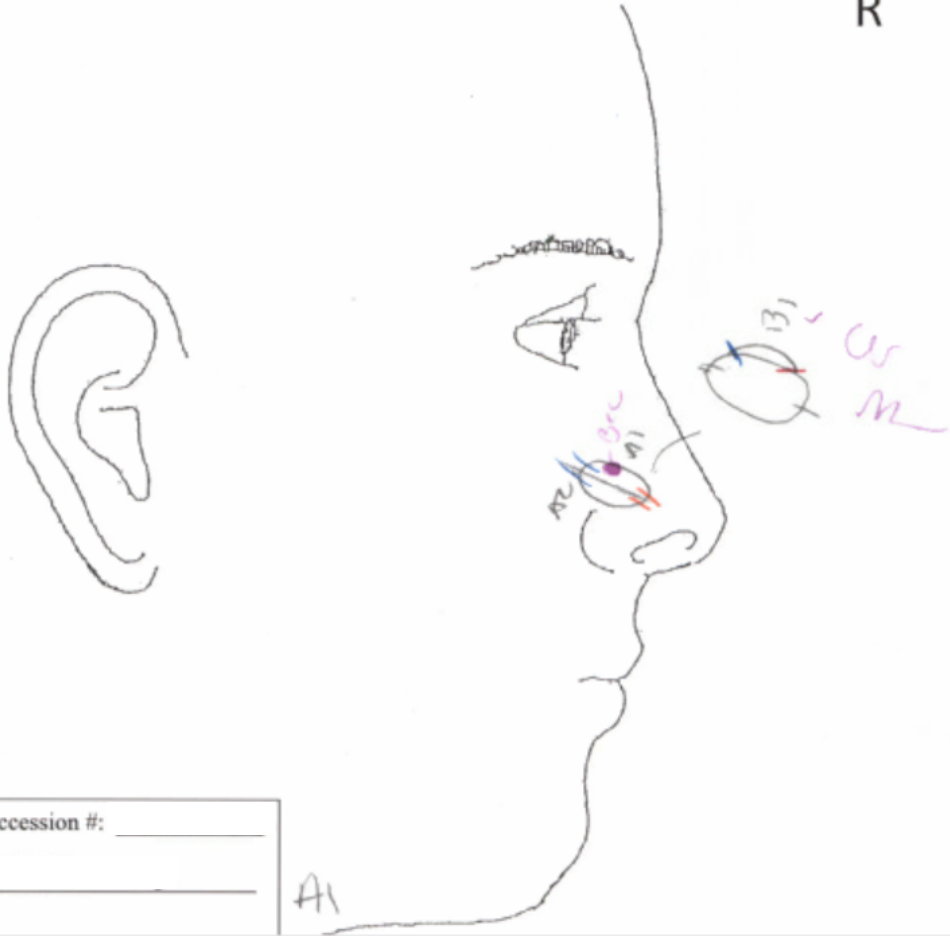

Mohs Accession #: \_\_\_\_\_  
 Date: \_\_\_\_\_

A1

R

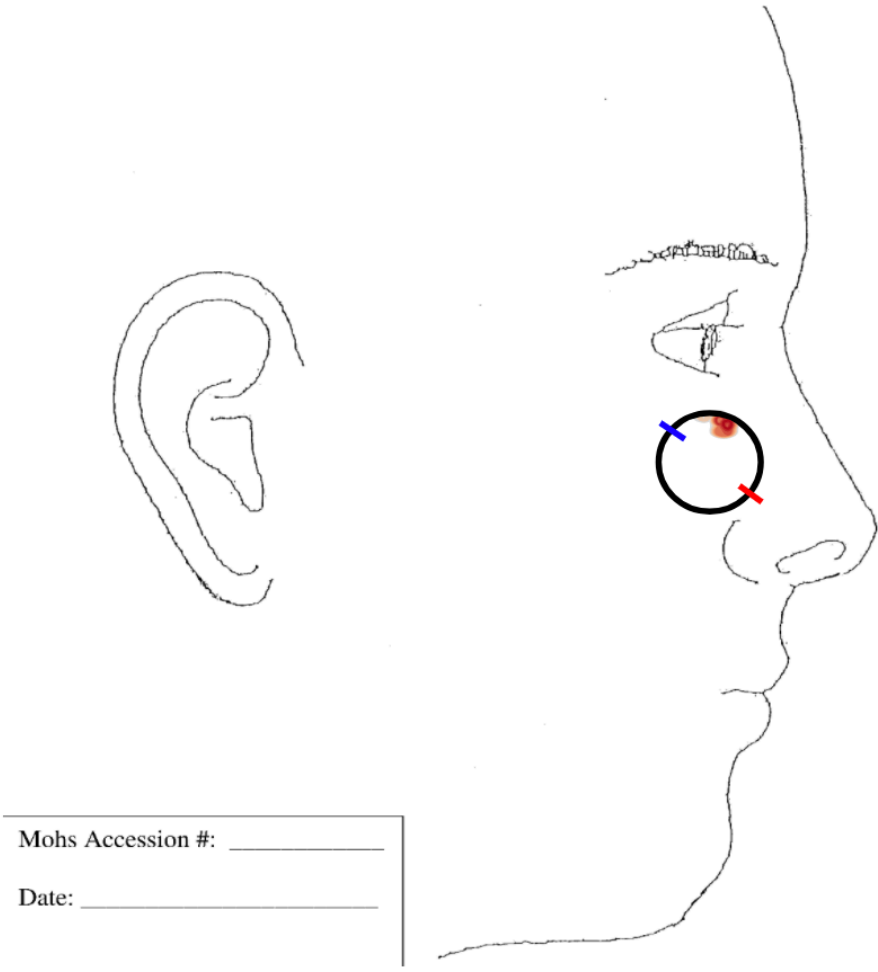

Mohs Accession #: \_\_\_\_\_  
 Date: \_\_\_\_\_

R

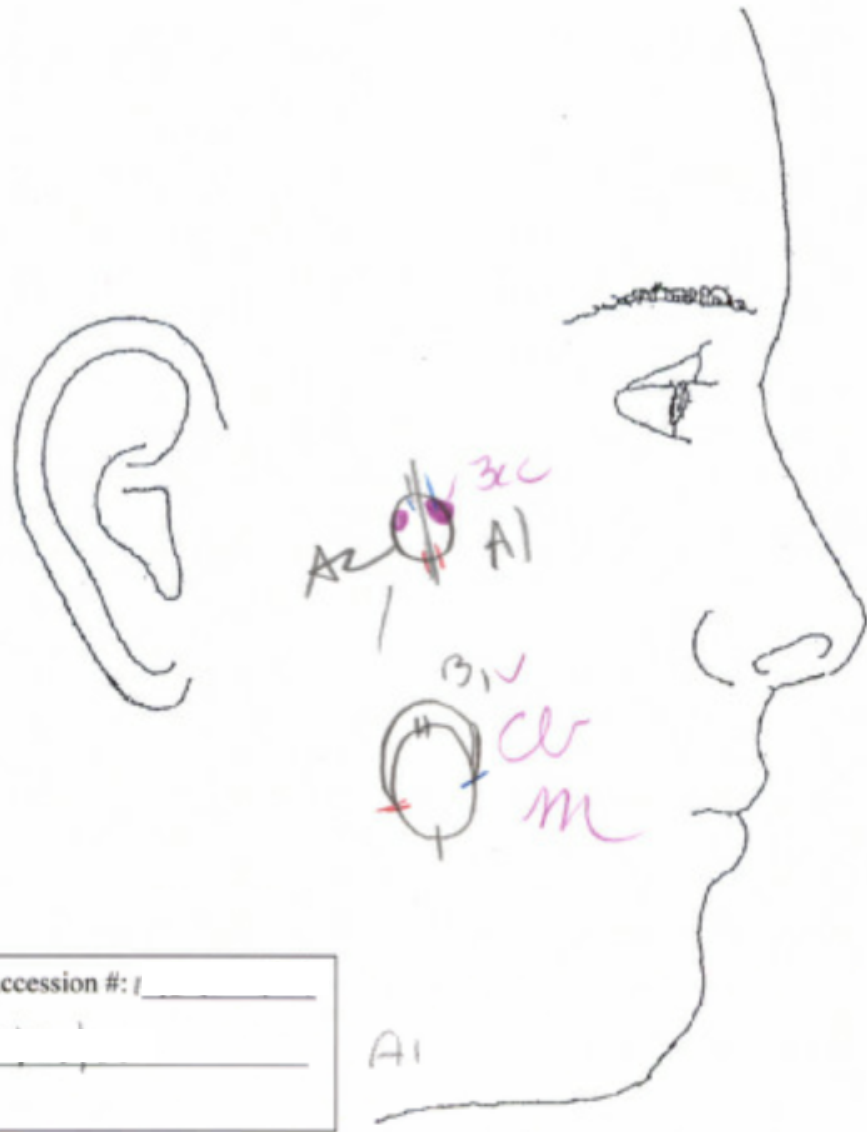

Mohs Accession #: 1

Date:

A1

R

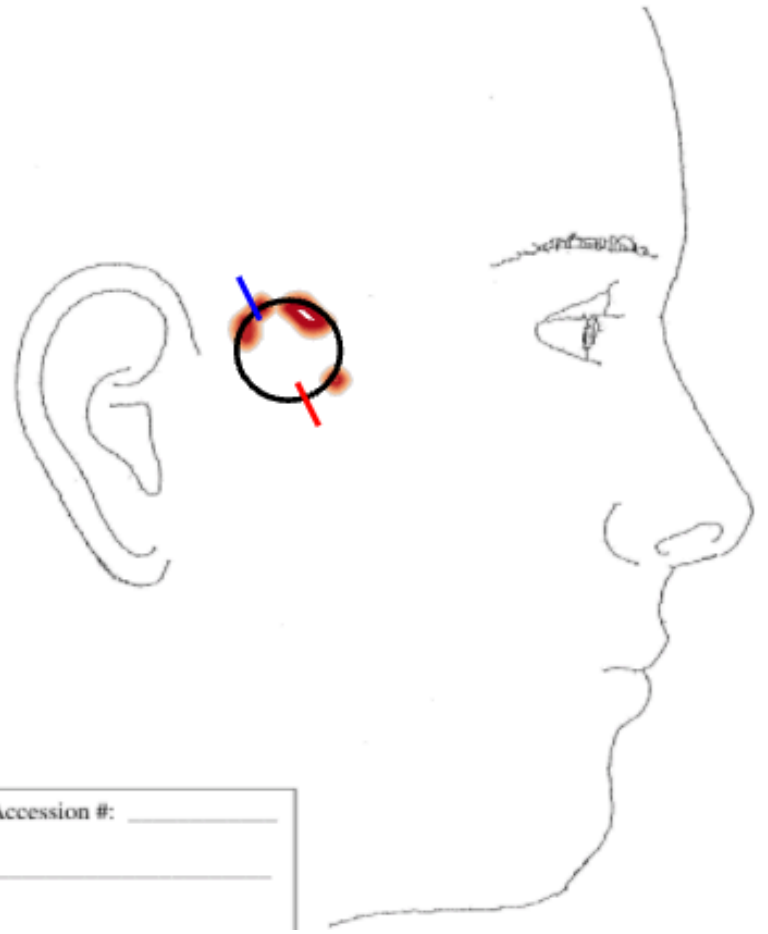

Mohs Accession #:

Date:

m BCL  
e

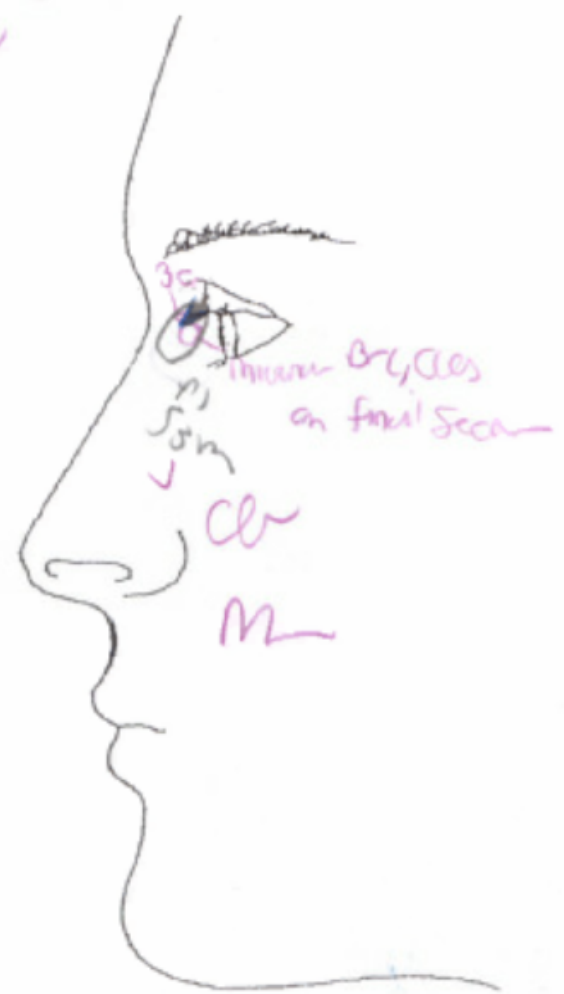

Mohs Accession #: \_\_\_\_\_  
Date: \_\_\_\_\_

L

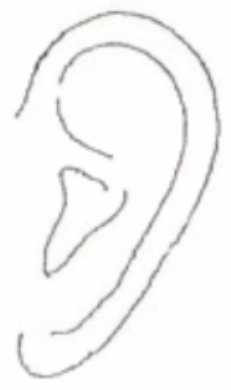

AI

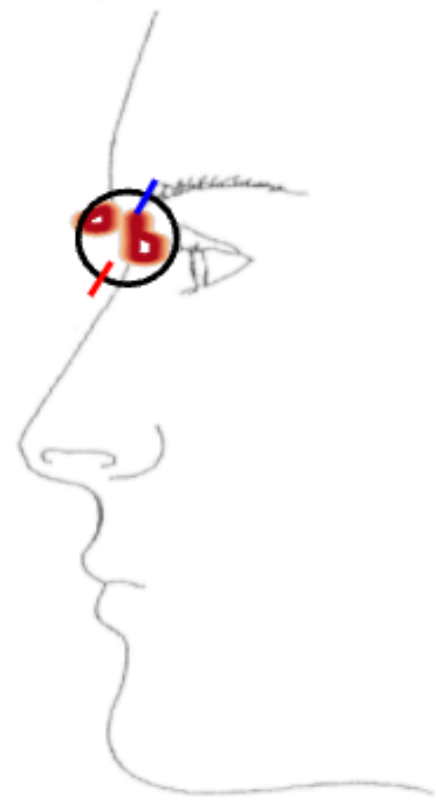

Mohs Accession #: \_\_\_\_\_  
Date: \_\_\_\_\_

L

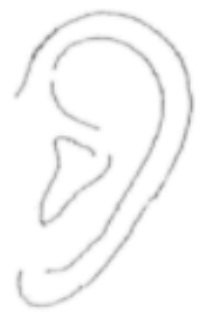



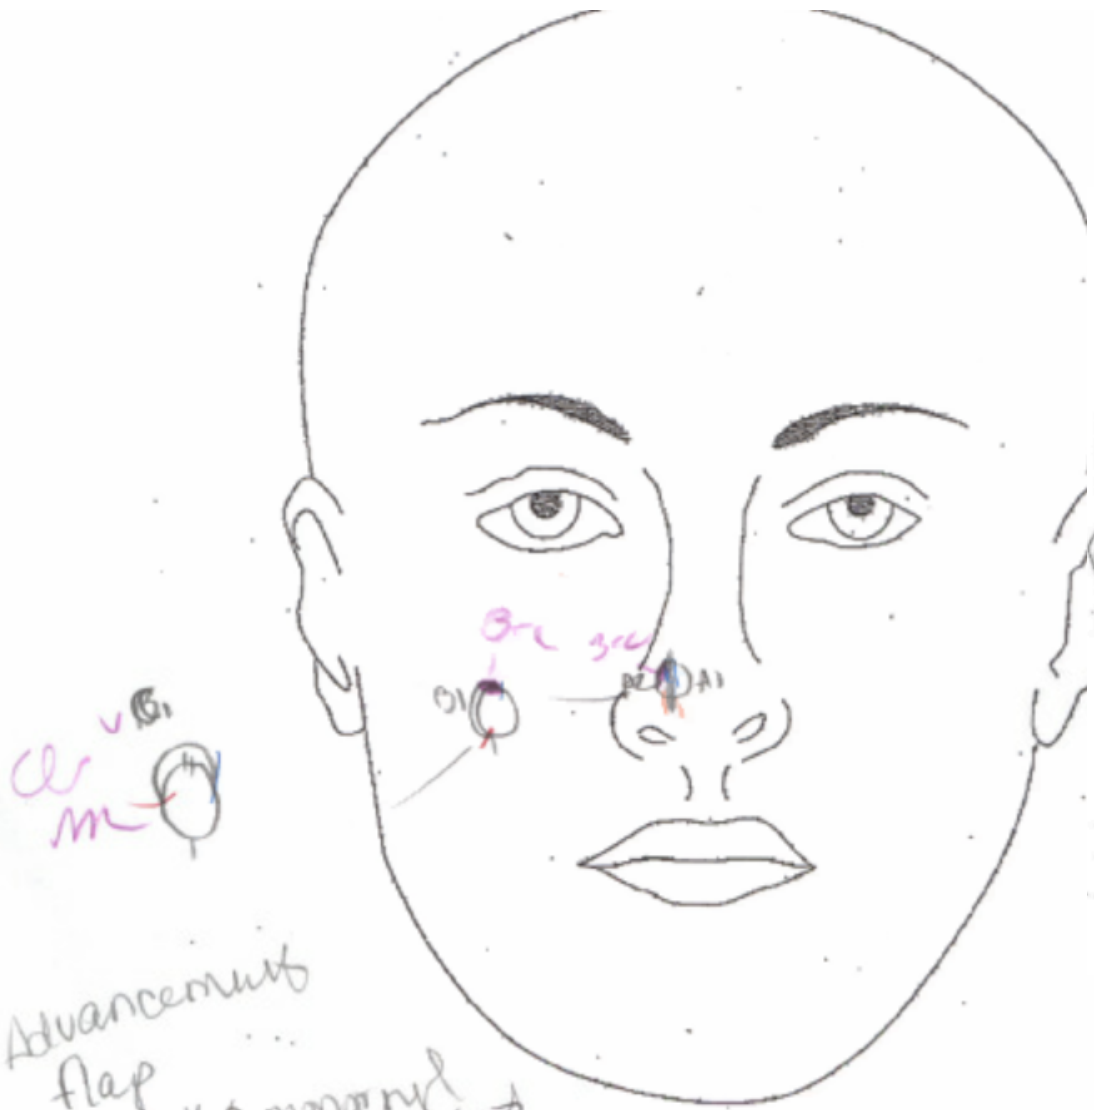

Advanced flap  
4-0 mononyl  
- sutures

**A**

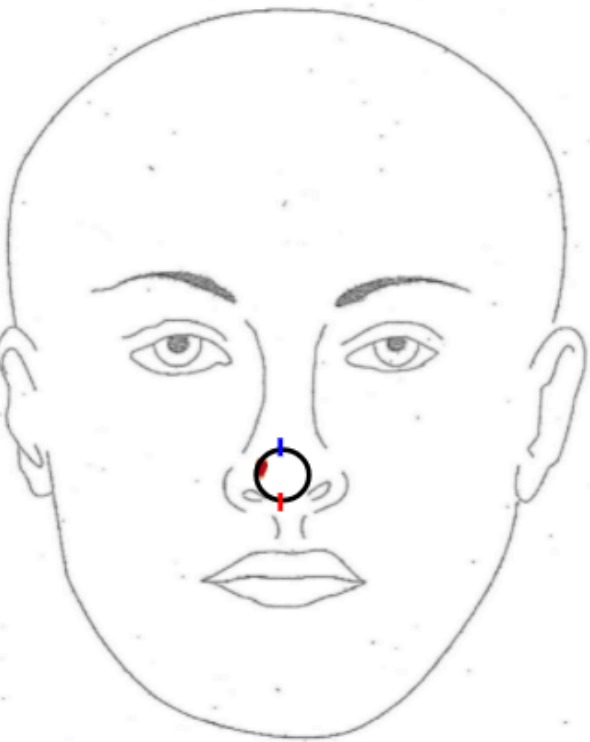

**B**

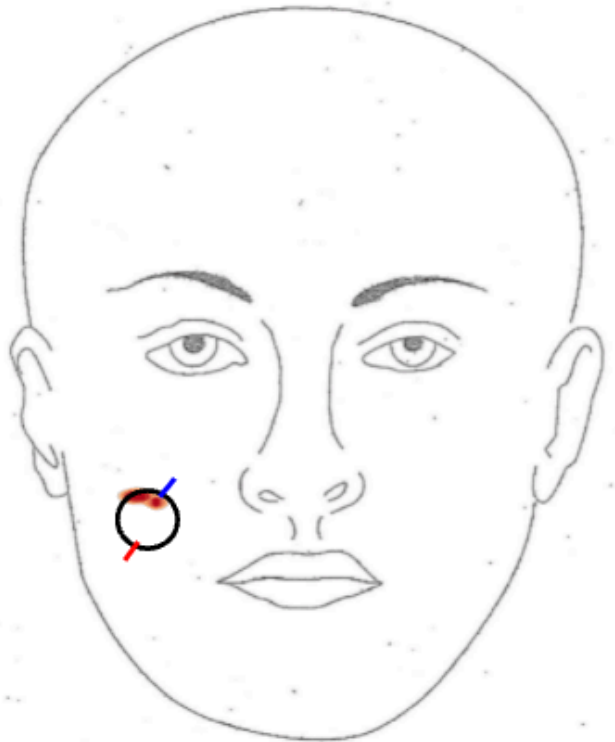

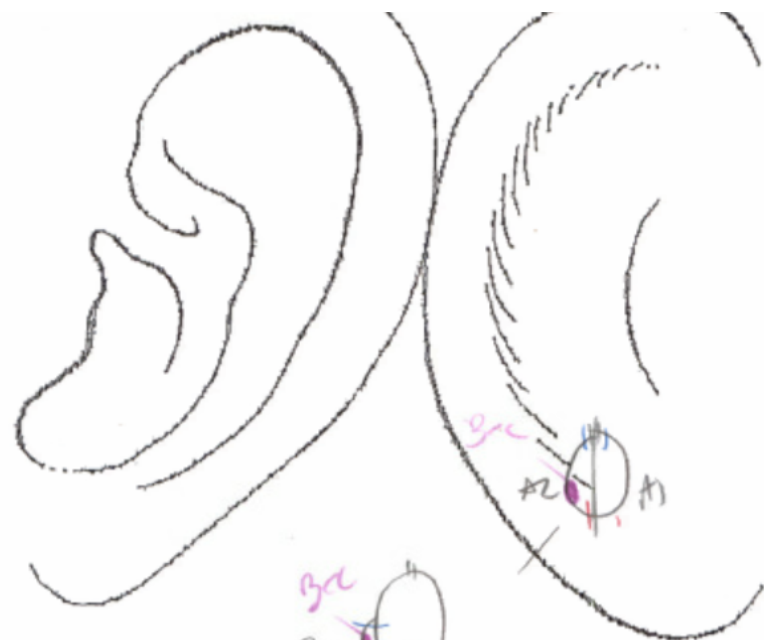

3a  
B1  
g1/cx

A1

3a  
w

Mohs Accession #: \_\_\_\_\_  
Date: \_\_\_\_\_

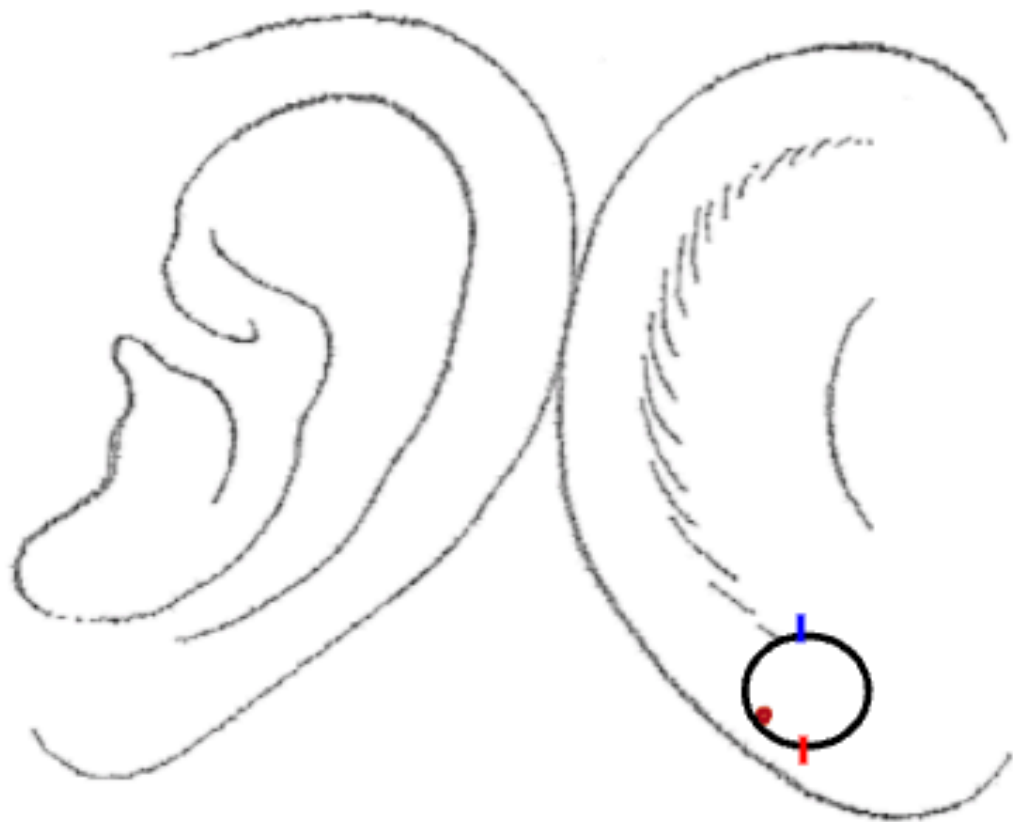

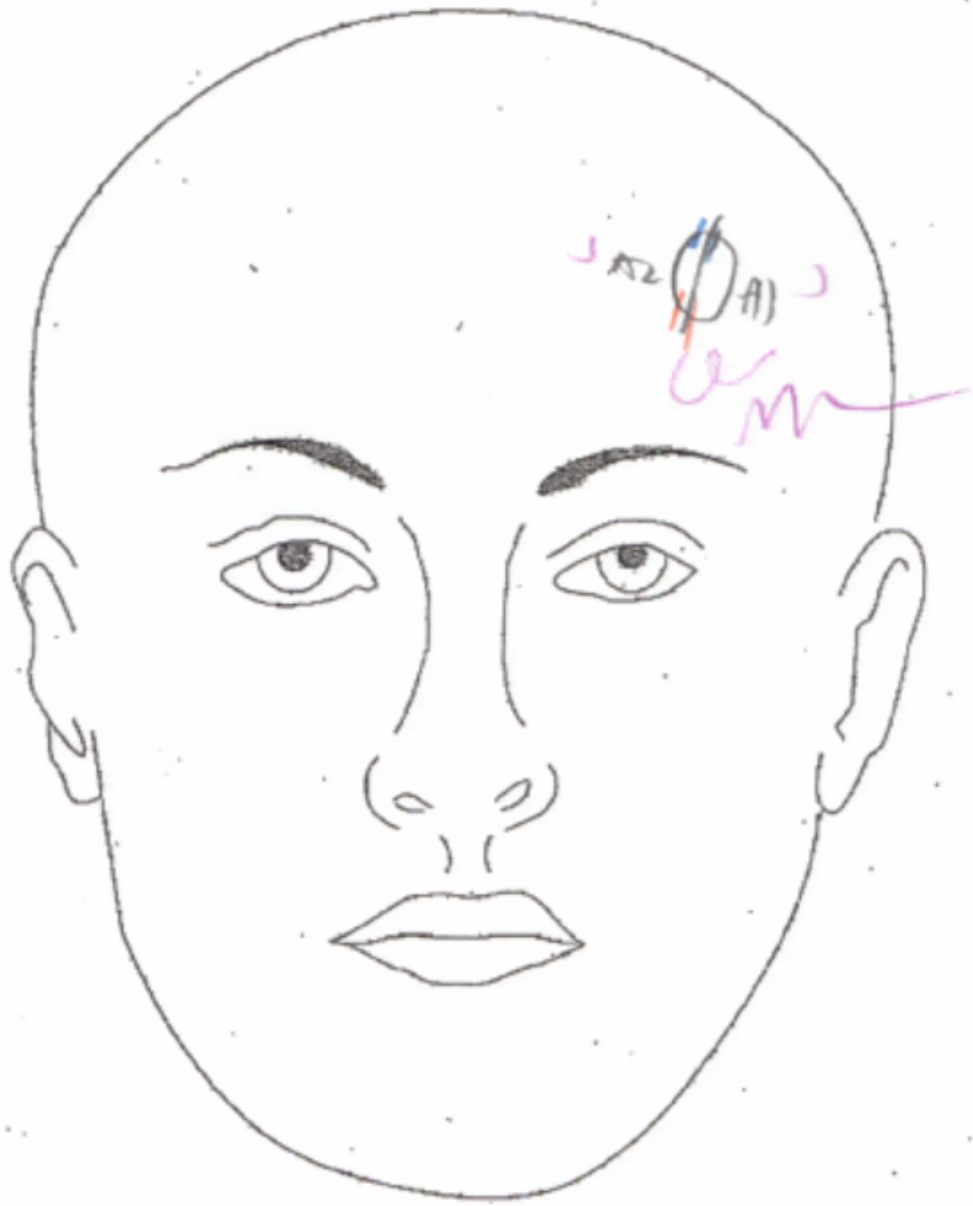

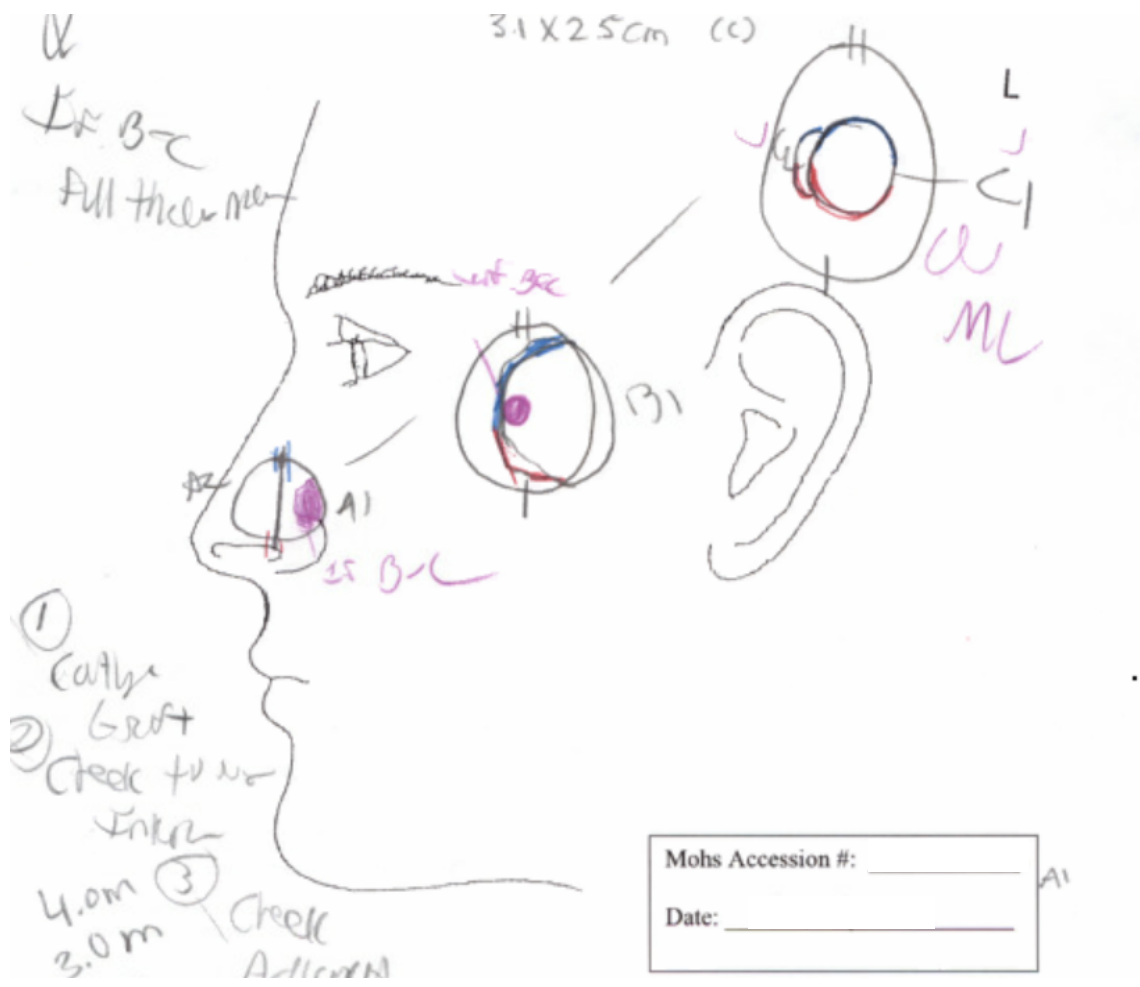

**B**

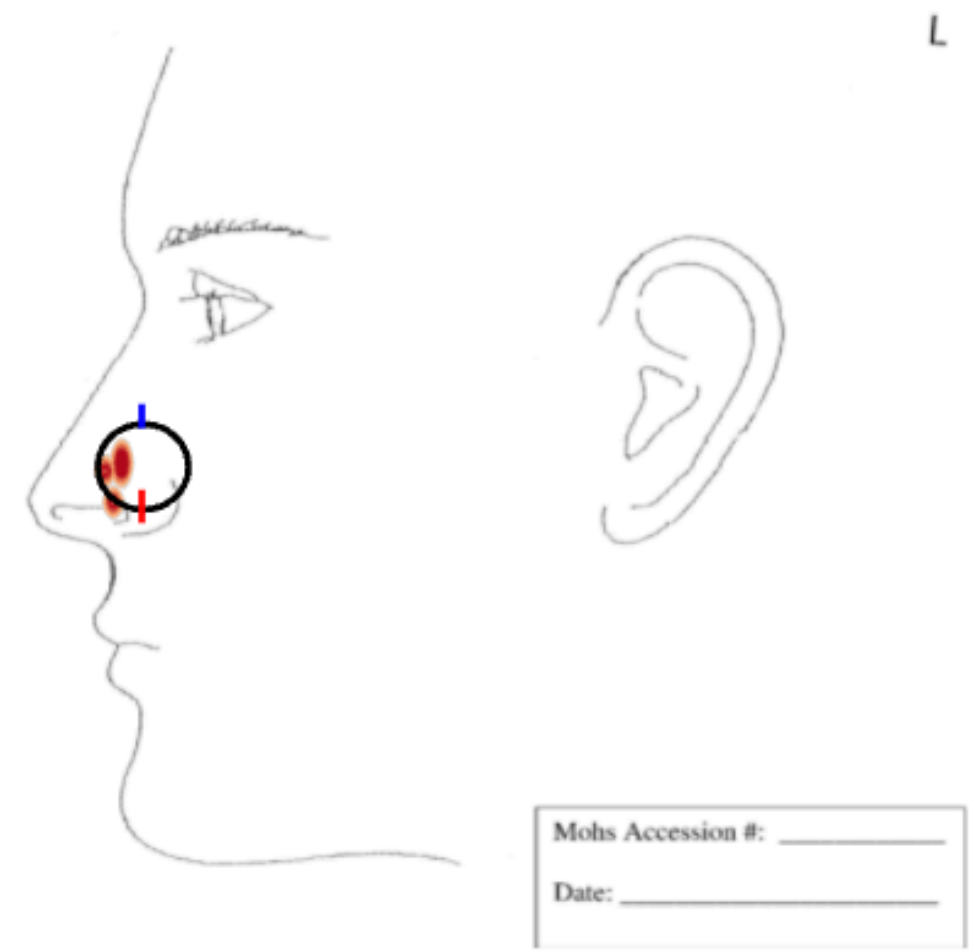

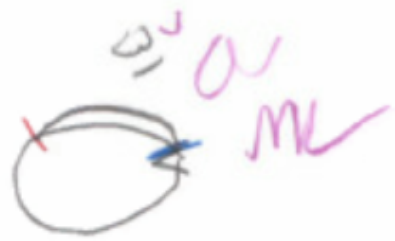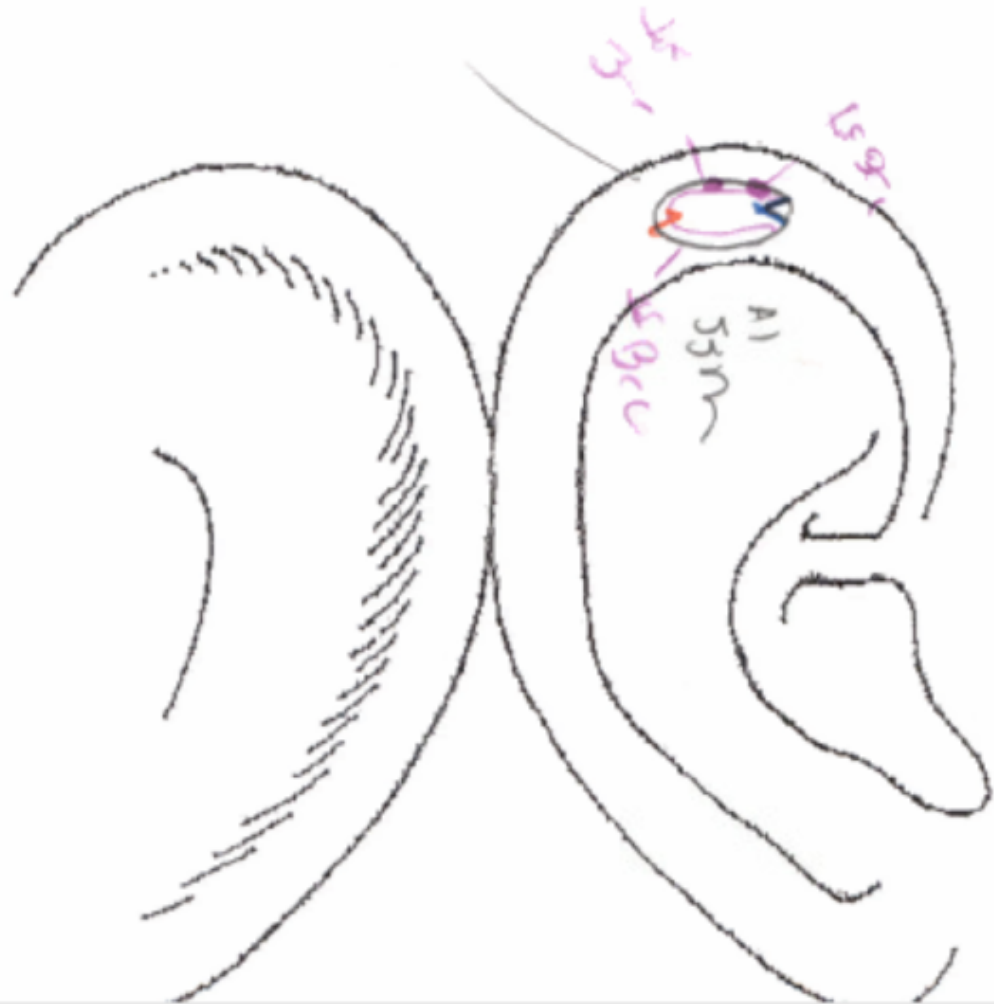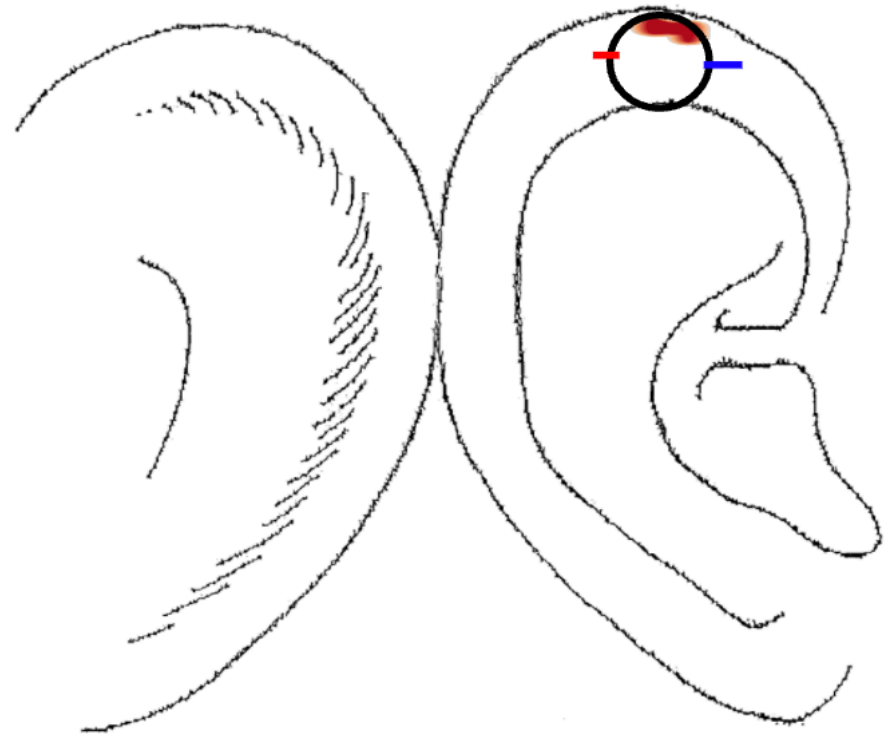

R

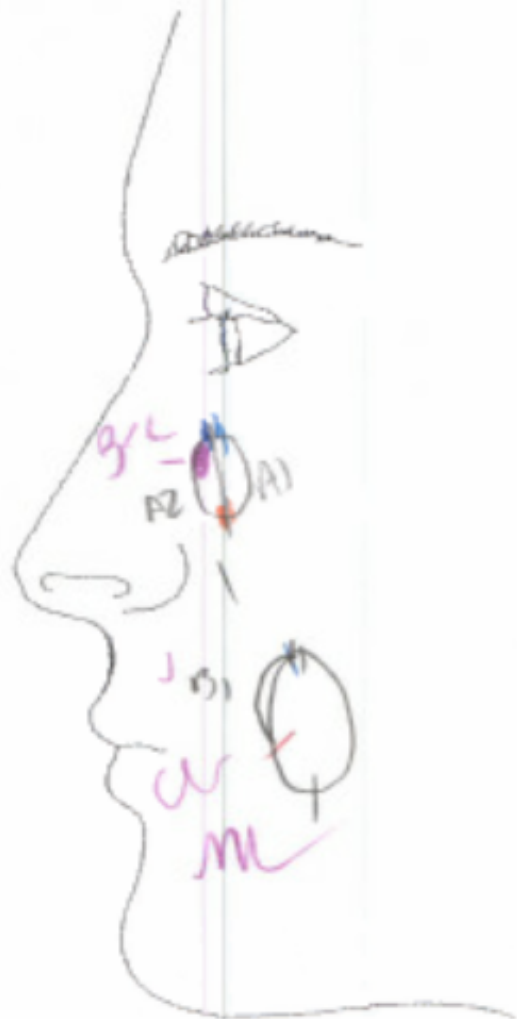

Mohs Accession #: \_\_\_\_\_  
Date: \_\_\_\_\_

A1

L

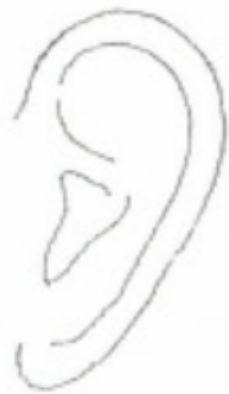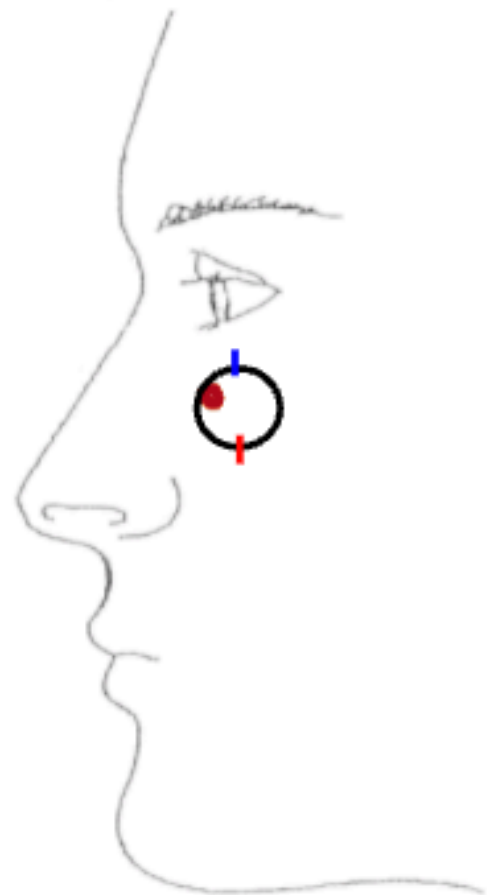

Mohs Accession #: \_\_\_\_\_  
Date: \_\_\_\_\_

L

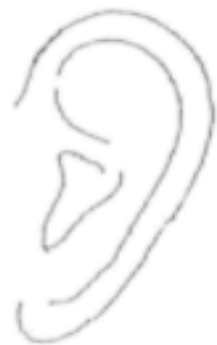

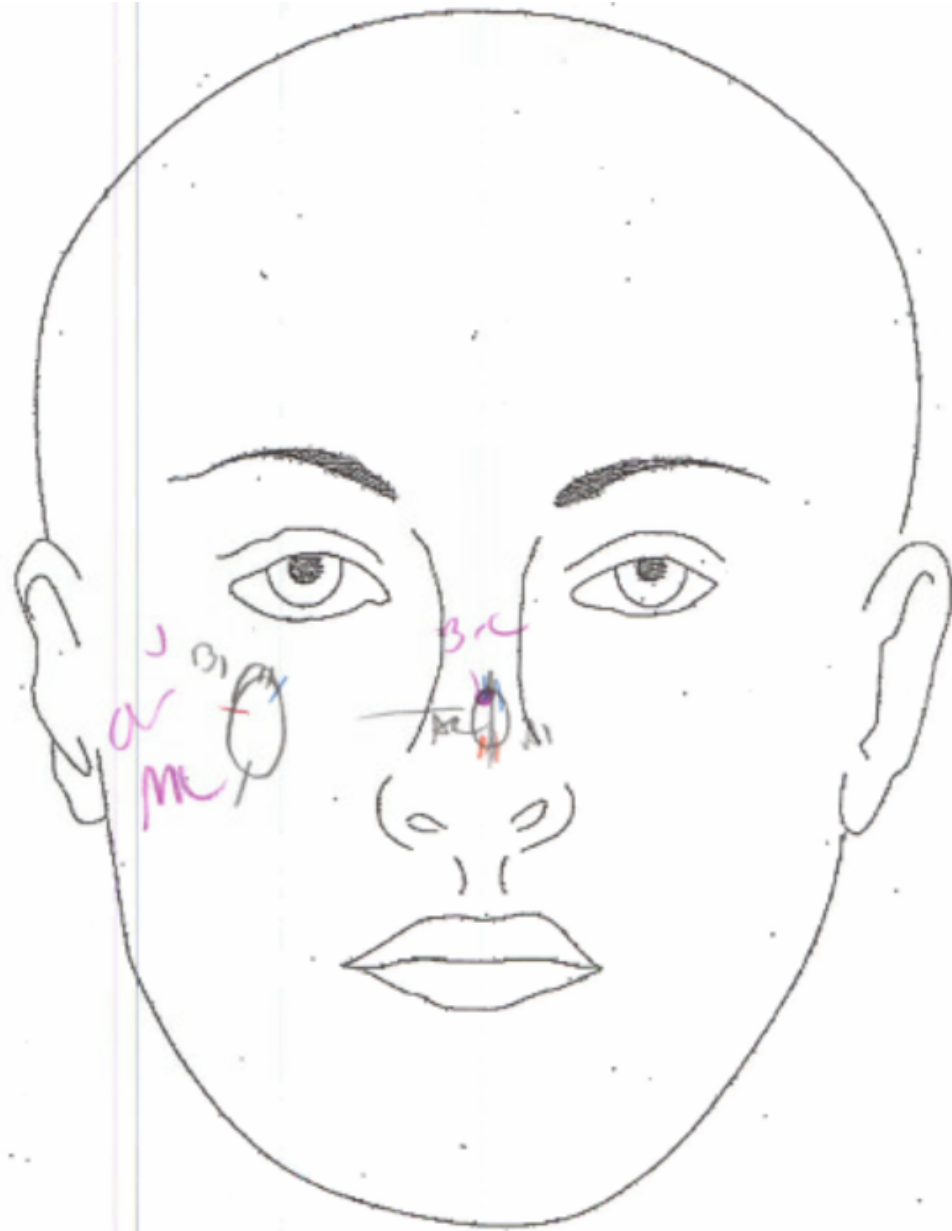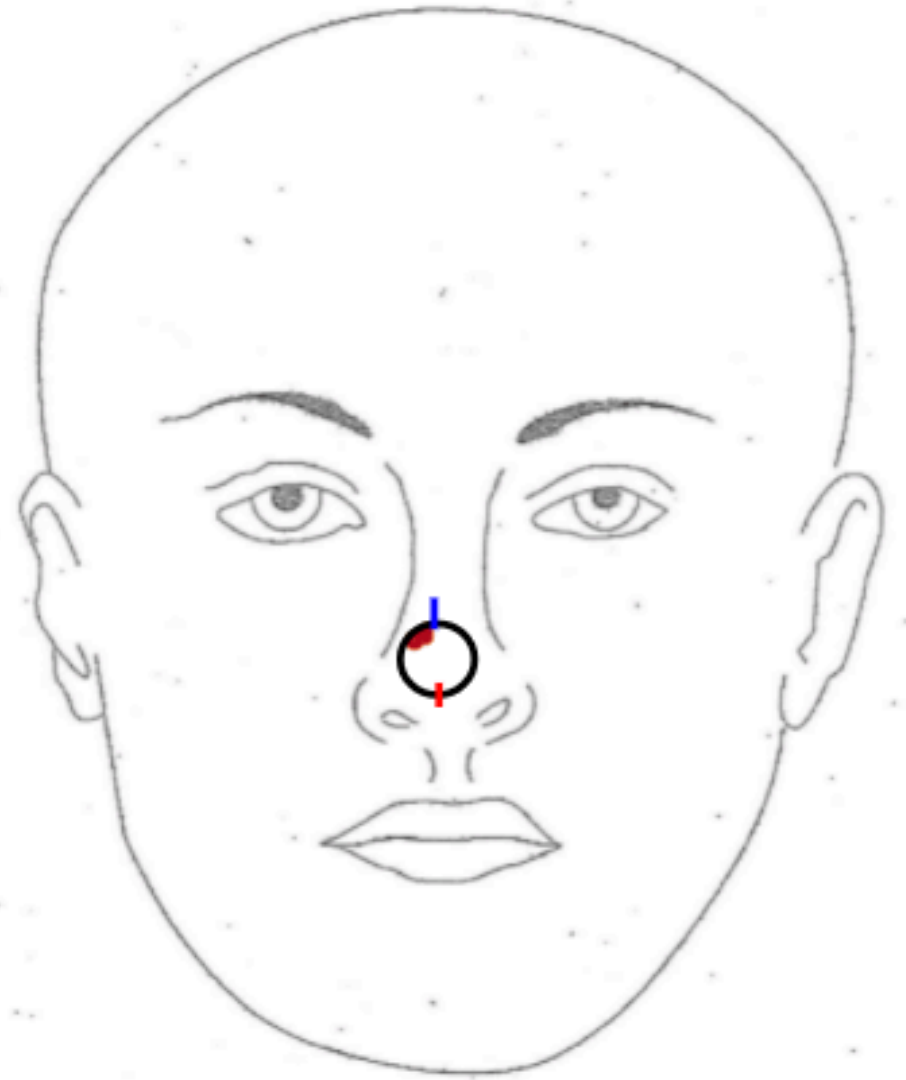

BCC IV  
stage

1.0 x 0.8 cm

2.1 x 1.3

B1

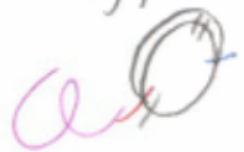

M

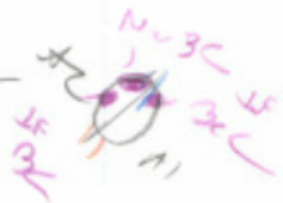

CLL  
~~CLL~~  
4.0m  
5.0F

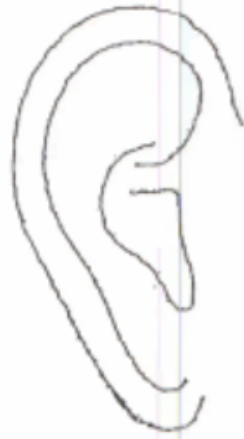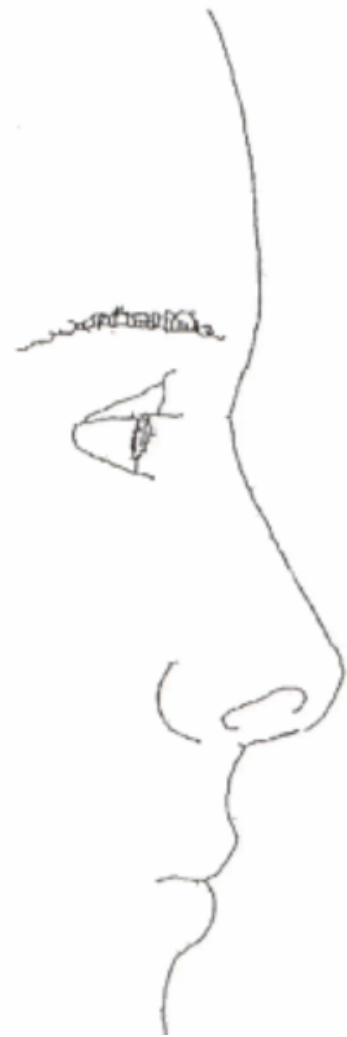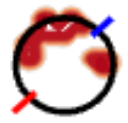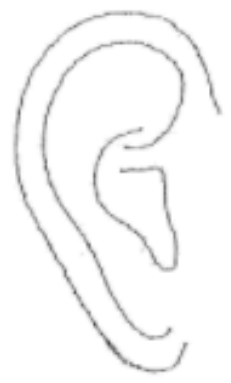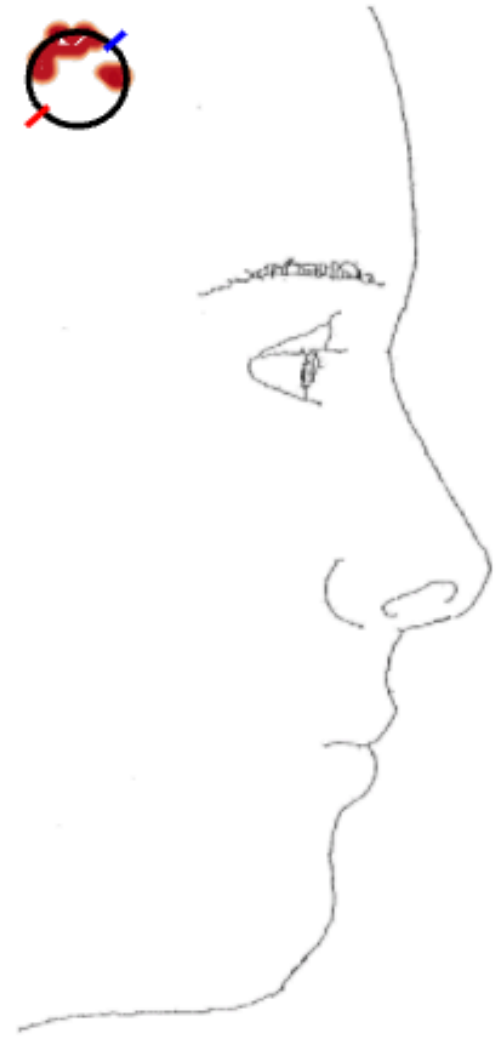

Mohs Accession #: \_\_\_\_\_

Date: \_\_\_\_\_



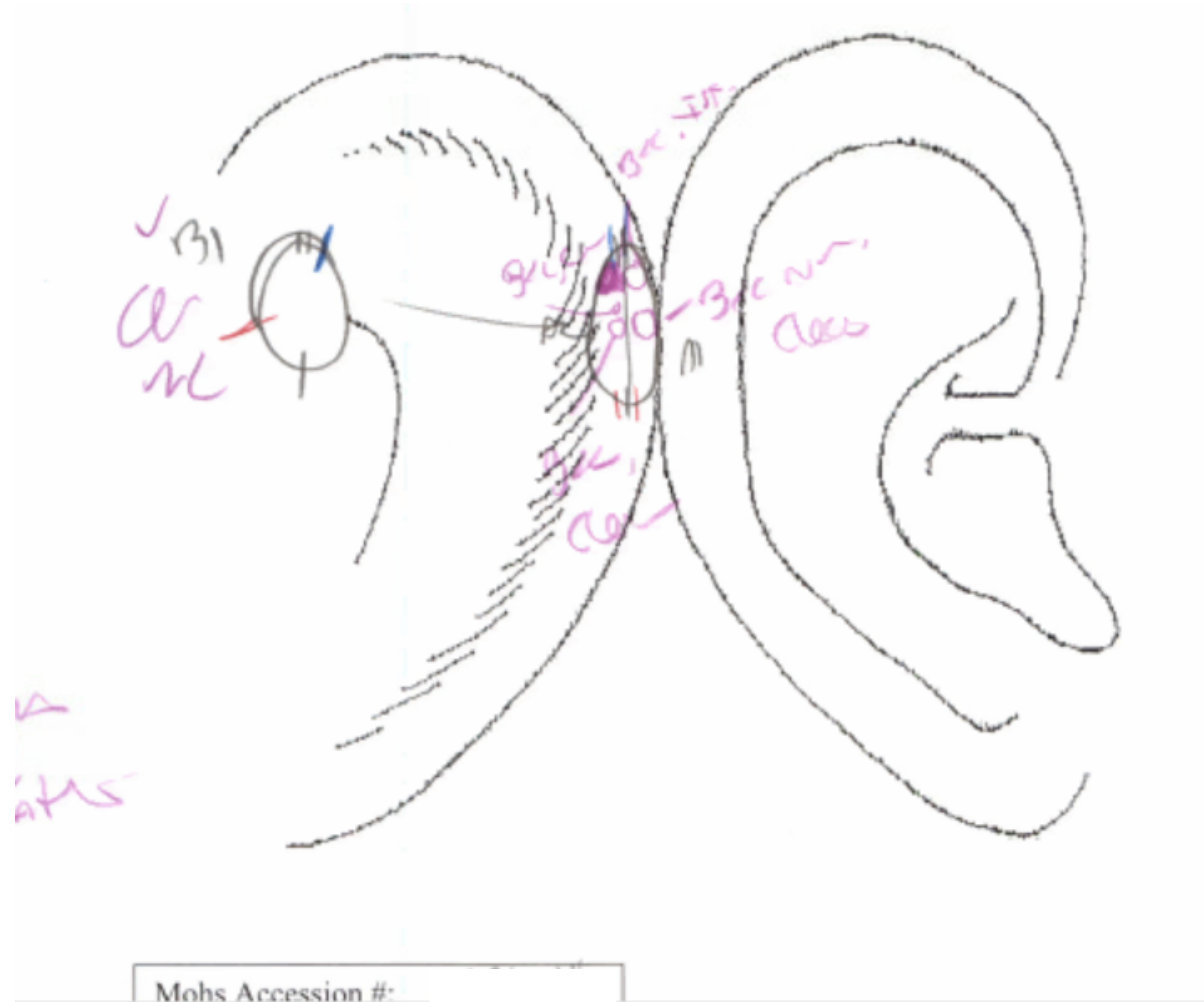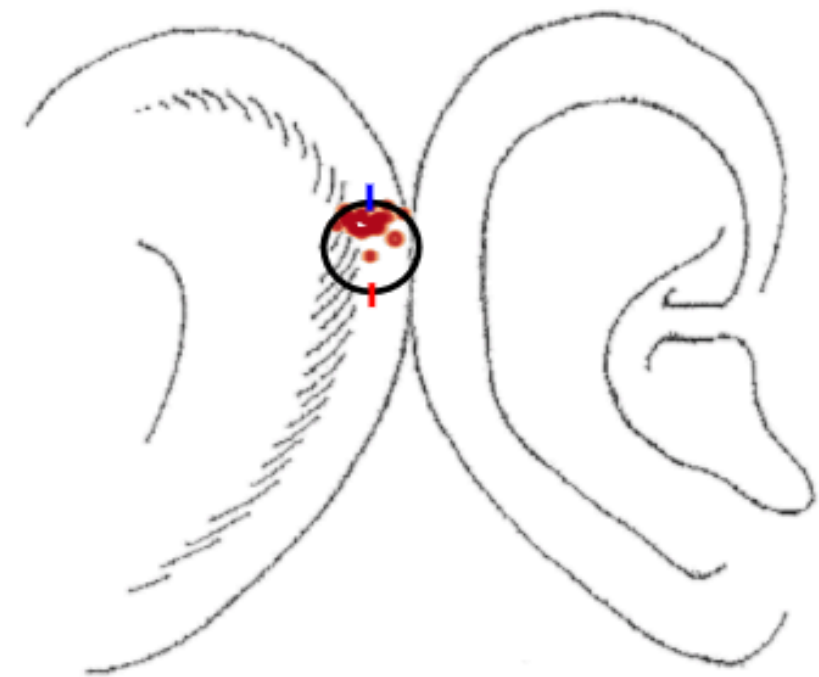

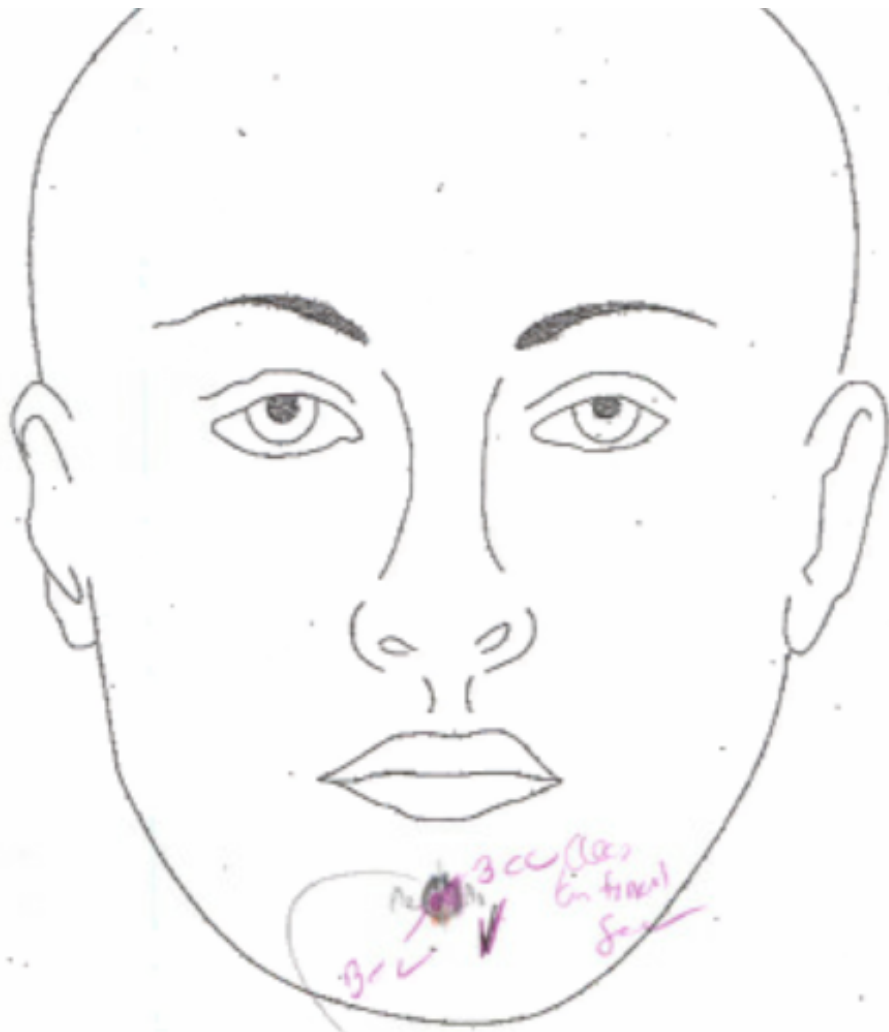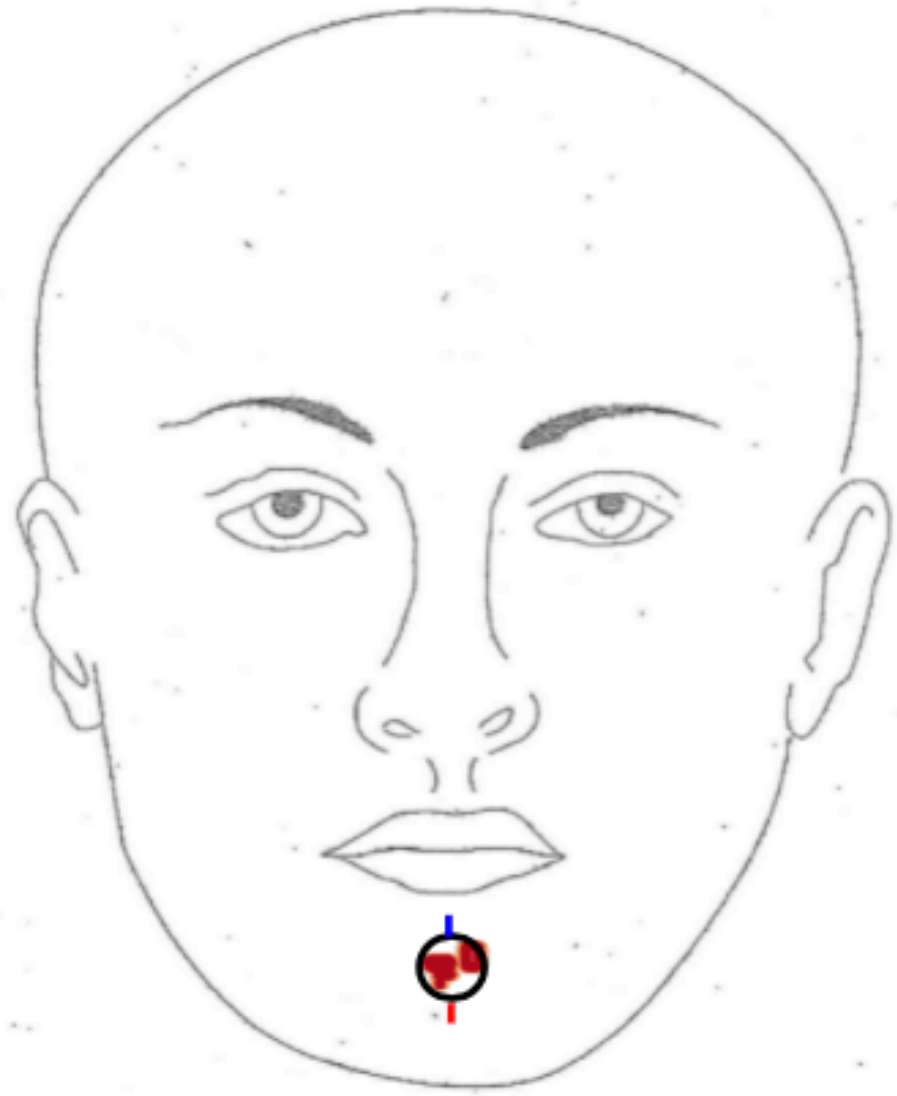

IoHS Accession #: \_\_\_\_\_

Date: \_\_\_\_\_

31

C/M

g tissue

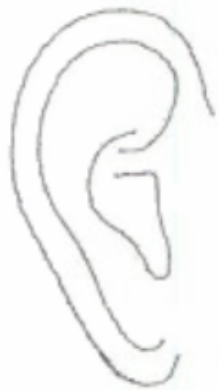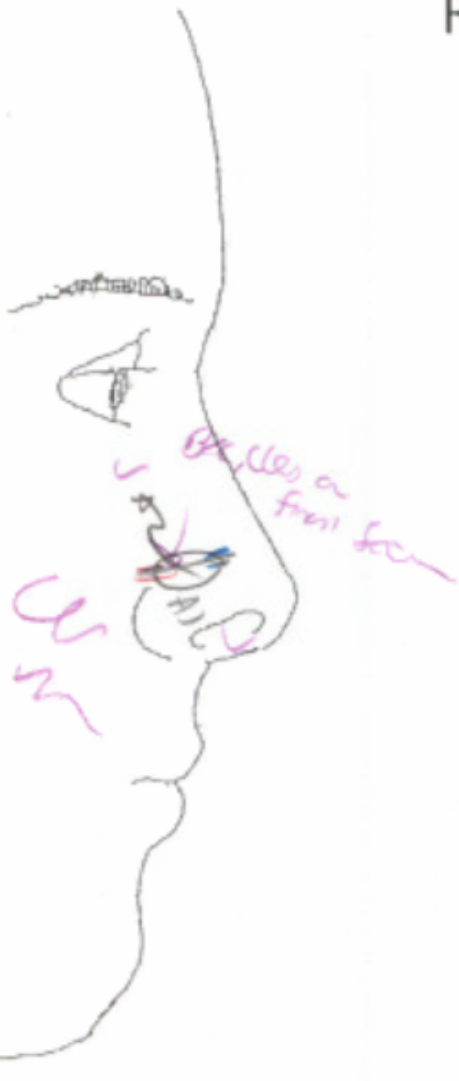

F

Mohs Accession #: \_\_\_\_\_

Date: \_\_\_\_\_

A1

R

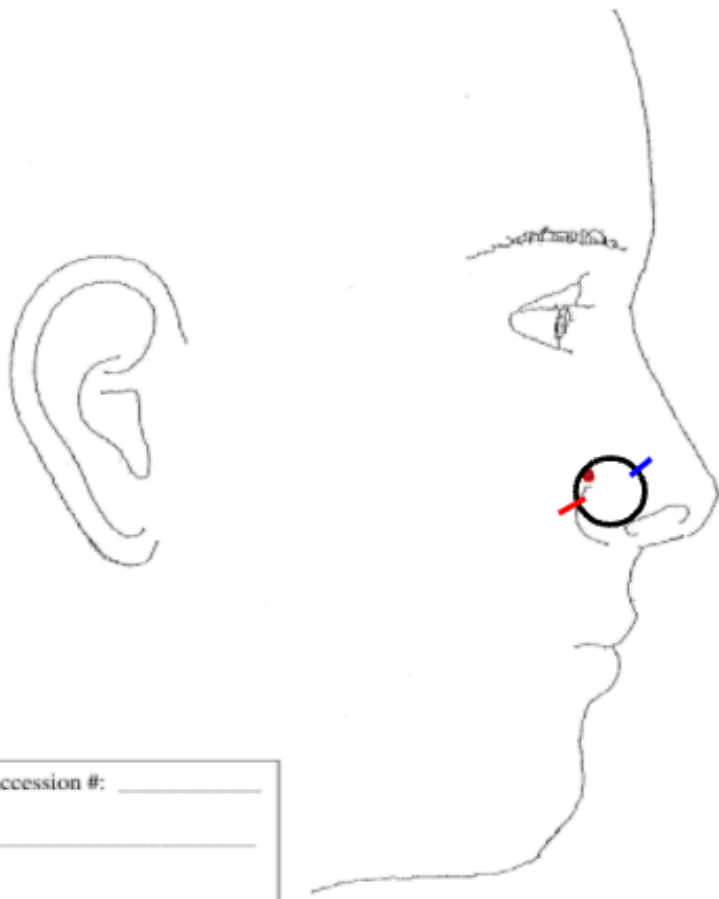

Mohs Accession #: \_\_\_\_\_

Date: \_\_\_\_\_

R

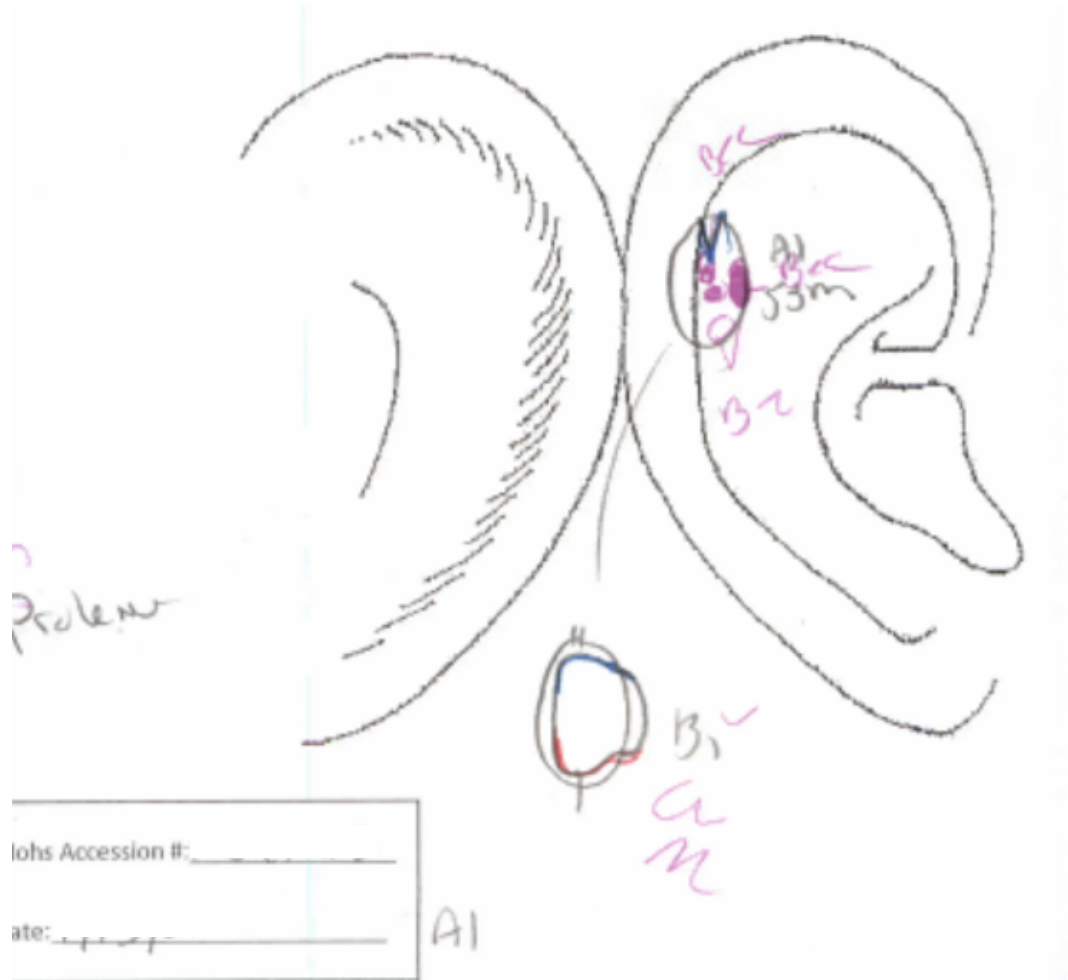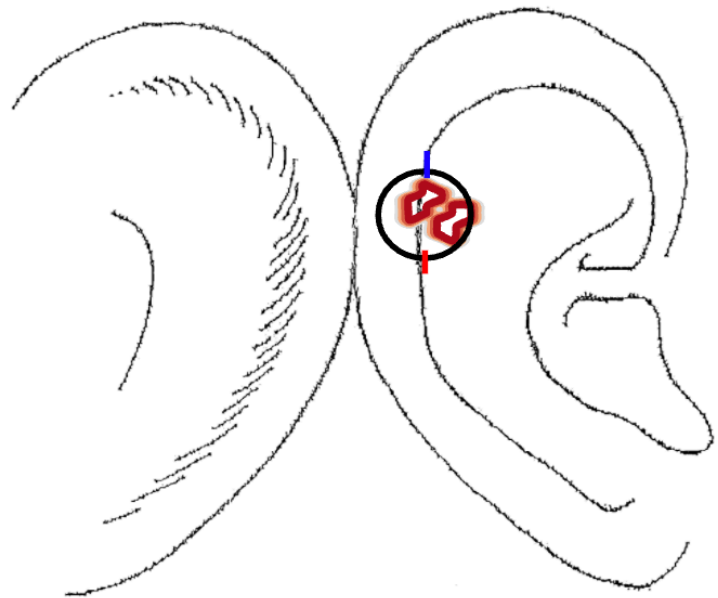

2.0 x 1.5 cm (4)

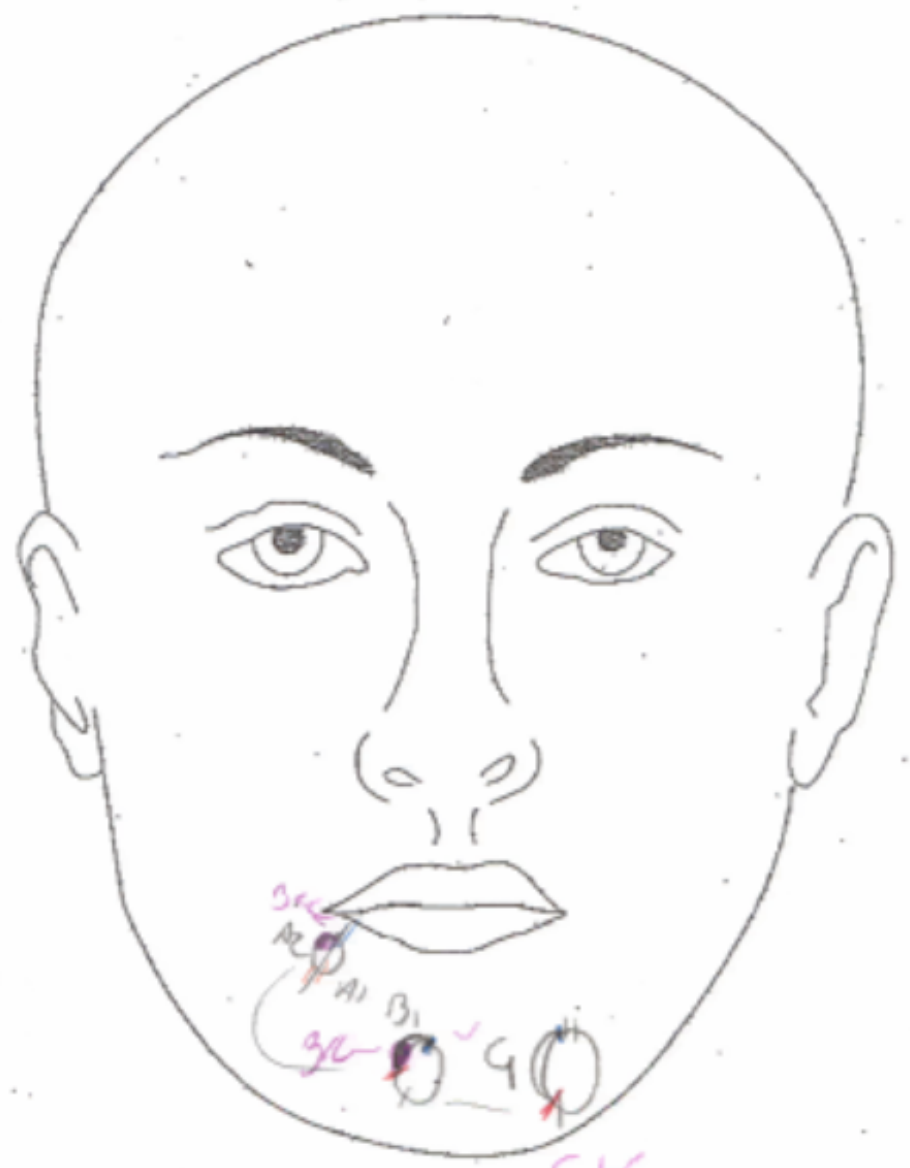

CU  
ML

Mohs Accession #: \_\_\_\_\_

A

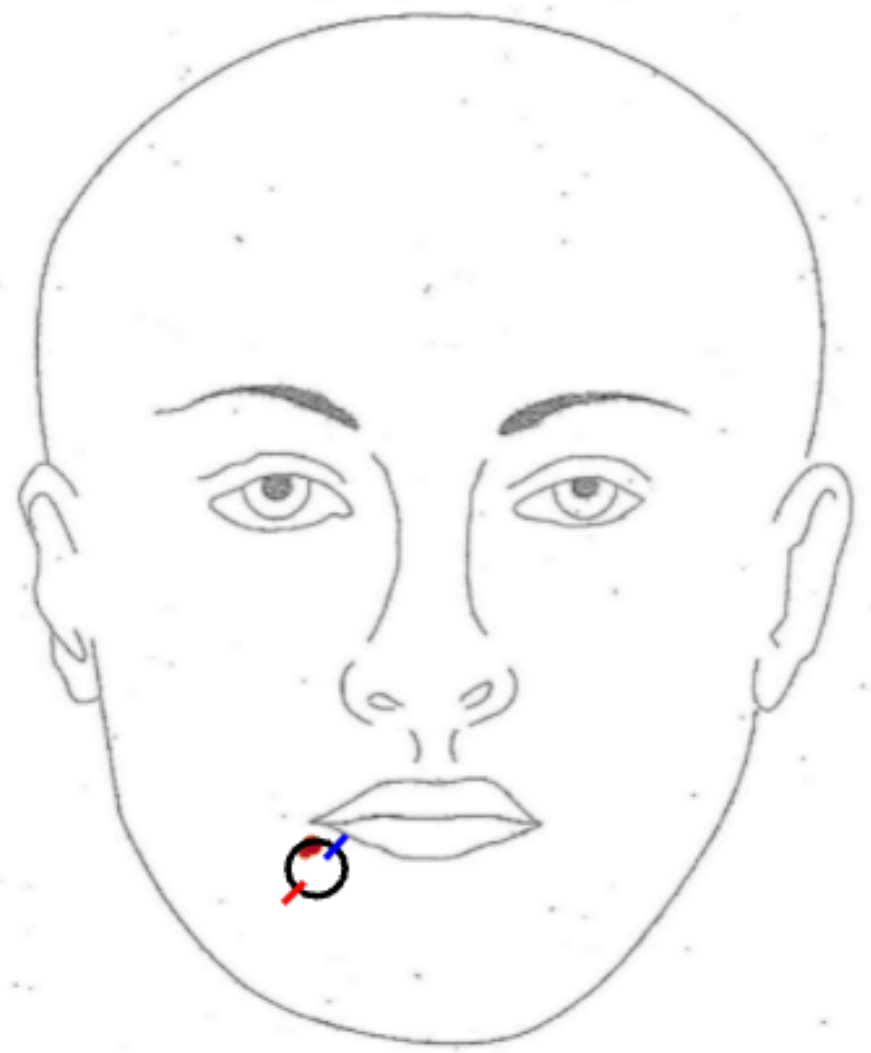

R

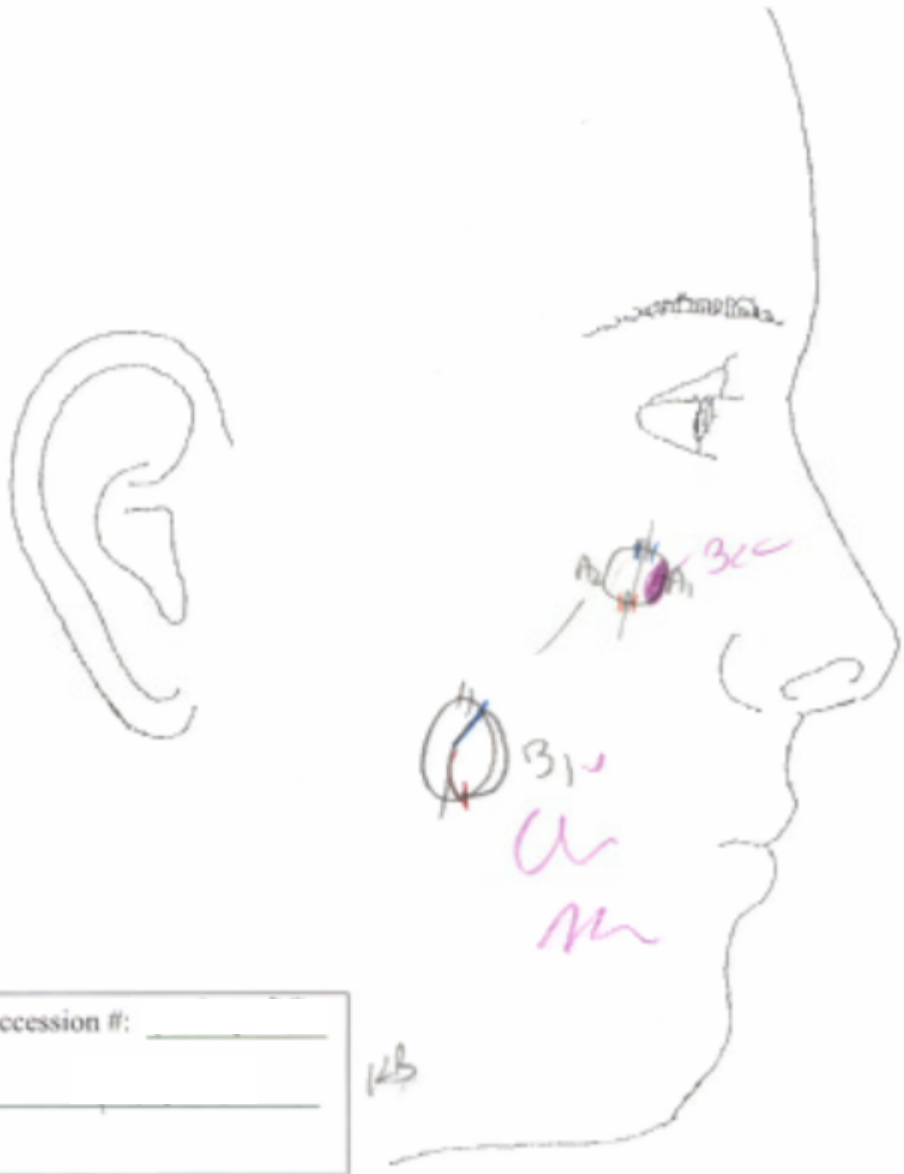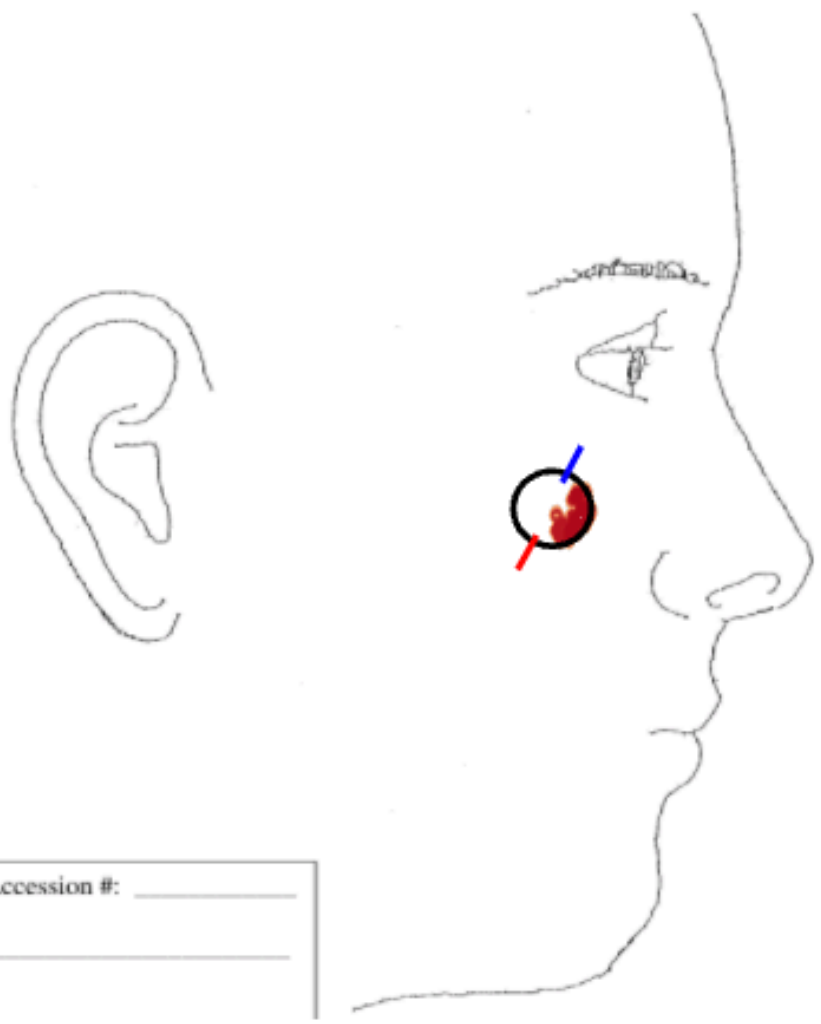

Mohs Accession #: \_\_\_\_\_

Date: \_\_\_\_\_

KB

Mohs Accession #: \_\_\_\_\_

Date: \_\_\_\_\_

|                                          |                                           |                            |
|------------------------------------------|-------------------------------------------|----------------------------|
| Tumor Type<br><i>BCC - nodular</i>       | Location (per path report)<br><i>neck</i> | Anatomic Area<br><i>fa</i> |
| Initial size (cm)<br><i>1.1 x 0.9 cm</i> | Final Defect (cm)<br><i>1.4 x 1.3 cm</i>  | Room #<br><i>30</i>        |

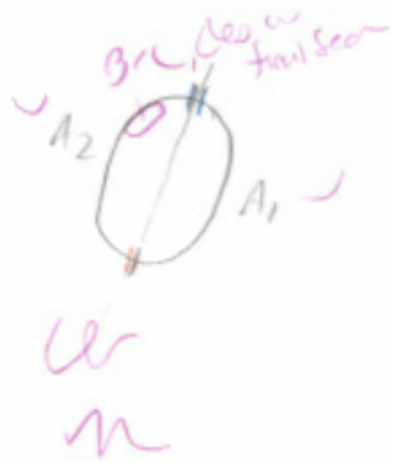

*LC  
1 m  
5-6F*

Mohs Accession #: \_\_\_\_\_  
Date: \_\_\_\_\_

*A1*

L

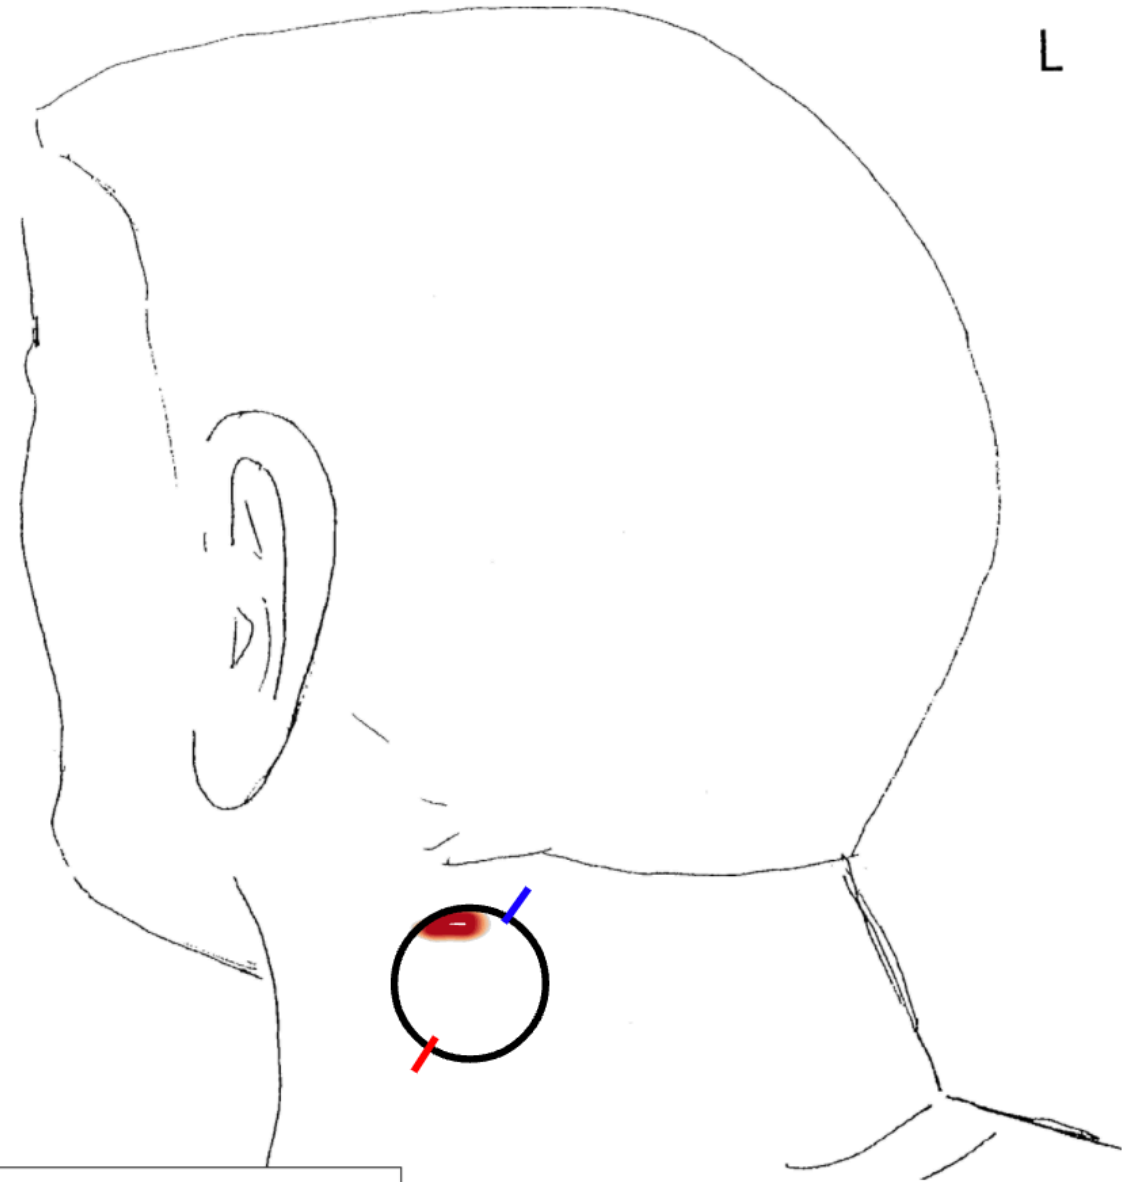

Mohs Accession #: \_\_\_\_\_  
Date: \_\_\_\_\_
